# Supplementary material for: Mortality among the homeless: Causes and meteorological relationships
Source: PLoS One. 2017 Dec 21;12(12):e0189938. doi: 10.1371/journal.pone.0189938 (PMC5739436; doi:10.1371/journal.pone.0189938)
Supplement: S1 Data — (XLSX) [file pone.0189938.s001.xlsx]

## Sheet: Homeless
No	Gender	Age of death	Birth - year	Death - year	Death - month	Death - day	Autopsy	ICD 10	Cold	External Cause	Violent Death	Alcohol related death	Alcohol related death + cold	Smoking-attributable deaths (bmc ph)	European Shortlist for Causes of Death, 1998
1	M	40	1972	2012	7	22	Y	I26	N	N	N	N	N	Y	Diseases of the circulatory system
2	M	59	1954	2013	9	22	Y	W69	N	Y	N	N	N	N	External causes of injury and poisoning
3	M	61	1954	2015	4	8	Y	I26	N	N	N	N	N	Y	Diseases of the circulatory system
4	M	52	1958	2010	11	12	Y	K74	N	N	N	N	N	N	Diseases of the digestive system
5	M	52	1958	2010	1	8	Y	J18	N	N	N	N	N	Y	Diseases of the respiratory system
6	M	63	1948	2011	11	21	N	C26	N	N	N	N	N	N	Neoplasms
7	M	59	1955	2014	6	16	N	C34	N	N	N	N	N	Y	Neoplasms
8	M	66	1947	2013	7	19	Y	I26	N	N	N	N	N	Y	Diseases of the circulatory system
9	M	56	1954	2010	6	6	UNK	C80	N	N	N	N	N	N	Neoplasms
10	M	65	1945	2010	1	3	N	C22	N	N	N	N	N	N	Neoplasms
11	M	54	1957	2011	6	14	Y	I21	N	N	N	N	N	Y	Diseases of the circulatory system
12	M	61	1954	2015	7	19	N	R96	N	N	N	N	N	N	Symptoms, signs, abnormal findings, ill-defined causes
13	F	42	1972	2014	10	28	Y	K70	N	N	N	Y	Y	N	Diseases of the digestive system
14	M	63	1952	2015	1	15	N	I63	N	N	N	N	N	Y	Diseases of the circulatory system
15	M	55	1955	2010	12	10	Y	X31	Y	Y	N	N	Y	N	External causes of injury and poisoning
16	M	59	1951	2010	7	11	N	C34	N	N	N	N	N	Y	Neoplasms
17	M	60	1955	2015	1	25	Y	I26	N	N	N	N	N	Y	Diseases of the circulatory system
18	F	61	1953	2014	12	29	Y	X31	Y	Y	N	N	Y	N	External causes of injury and poisoning
19	M	64	1951	2015	7	29	N	C61	N	N	N	N	N	N	Neoplasms
20	M	57	1953	2010	1	16	N	A41	N	N	N	N	N	N	Infectious and parasitic diseases
21	M	71	1939	2010	8	2	UNK	I21	N	N	N	N	N	Y	Diseases of the circulatory system
22	M	36	1979	2015	12	3	Y	Y15	N	Y	Y	Y	Y	N	External causes of injury and poisoning
23	M	65	1946	2011	7	26	N	G30	N	N	N	N	N	N	Diseases of the nervous system and the sense organs
24	M	57	1953	2010	8	5	Y	Y04	N	Y	Y	N	N	N	External causes of injury and poisoning
25	M	48	1963	2011	8	7	N	G31	N	N	N	N	N	N	Diseases of the nervous system and the sense organs
26	M	63	1953	2016	1	2	not available	not available	not available	not available	not available	not available	not available	not available	not available
27	M	47	1963	2010	3	29	Y	Y89	N	Y	N	N	N	N	External causes of injury and poisoning
28	M	58	1953	2011	5	10	N	G00	N	N	N	N	N	N	Diseases of the nervous system and the sense organs
29	M	54	1962	2016	10	31	not available	not available	not available	not available	not available	not available	not available	not available	not available
30	M	65	1947	2012	11	30	Y	K70	N	N	N	Y	Y	N	Diseases of the digestive system
31	M	58	1954	2012	12	6	Y	Y15	N	Y	Y	Y	Y	N	External causes of injury and poisoning
32	M	61	1955	2016	1	1	not available	not available	not available	not available	not available	not available	not available	not available	not available
33	M	55	1955	2010	1	3	Y	J18	N	N	N	N	N	Y	Diseases of the respiratory system
34	M	33	1980	2013	12	16	Y	Y15	N	Y	Y	Y	Y	N	External causes of injury and poisoning
35	M	46	1968	2014	2	7	Y	I26	N	N	N	N	N	Y	Diseases of the circulatory system
36	M	66	1944	2010	11	12	Y	J96	N	N	N	N	N	N	Diseases of the respiratory system
37	M	56	1954	2010	4	9	Y	K76	N	N	N	N	N	N	Diseases of the digestive system
38	M	47	1964	2011	7	24	Y	Y15	N	Y	Y	Y	Y	N	External causes of injury and poisoning
39	M	62	1953	2015	7	17	N	R99	N	N	N	N	N	N	Symptoms, signs, abnormal findings, ill-defined causes
40	M	57	1953	2010	7	6	Y	I61	N	N	N	N	N	Y	Diseases of the circulatory system
41	M	62	1951	2013	12	23	N	J44	N	N	N	N	N	Y	Diseases of the respiratory system
42	M	62	1950	2012	10	9	N	K70	N	N	N	Y	Y	N	Diseases of the digestive system
43	M	63	1953	2016	6	18	not available	not available	not available	not available	not available	not available	not available	not available	not available
44	M	59	1957	2016	1	3	not available	not available	not available	not available	not available	not available	not available	not available	not available
45	M	67	1949	2016	5	15	not available	not available	not available	not available	not available	not available	not available	not available	not available
46	M	65	1949	2014	8	18	Y	I71	N	N	N	N	N	Y	Diseases of the circulatory system
47	M	50	1960	2010	1	6	Y	K72	N	N	N	N	N	N	Diseases of the digestive system
48	M	43	1969	2012	1	20	Y	Y15	N	Y	Y	Y	Y	N	External causes of injury and poisoning
49	M	47	1967	2014	2	26	N	A16	N	N	N	N	N	N	Infectious and parasitic diseases
50	M	61	1950	2011	8	28	N	I46	N	N	N	N	N	Y	Diseases of the circulatory system
51	M	36	1976	2012	3	11	N	W69	N	Y	N	N	N	N	External causes of injury and poisoning
52	M	49	1967	2016	4	15	not available	not available	not available	not available	not available	not available	not available	not available	not available
53	M	56	1956	2012	2	27	Y	K76	N	N	N	N	N	N	Diseases of the digestive system
54	M	57	1957	2014	9	2	N	A16	N	N	N	N	N	N	Infectious and parasitic diseases
55	M	56	1960	2016	4	7	not available	not available	not available	not available	not available	not available	not available	not available	not available
56	M	81	1934	2015	4	7	N	I21	N	N	N	N	N	Y	Diseases of the circulatory system
57	M	51	1961	2012	10	27	Y	Y15	N	Y	Y	Y	Y	N	External causes of injury and poisoning
58	M	28	1983	2011	1	17	N	Y15	N	Y	Y	Y	Y	N	External causes of injury and poisoning
59	M	67	1948	2015	11	4	N	I46	N	N	N	N	N	Y	Diseases of the circulatory system
60	M	51	1960	2011	10	8	Y	I60	N	N	N	N	N	Y	Diseases of the circulatory system
61	M	29	1983	2012	12	24	Y	G40	N	N	N	N	N	N	Diseases of the nervous system and the sense organs
62	M	62	1952	2014	11	16	N	I25	N	N	N	N	N	Y	Diseases of the circulatory system
63	M	45	1971	2016	10	21	not available	not available	not available	not available	not available	not available	not available	not available	not available
64	M	67	1949	2016	12	7	not available	not available	not available	not available	not available	not available	not available	not available	not available
65	M	67	1948	2015	11	25	N	F10	N	N	N	Y	Y	N	Mental and behavioural disorders
66	M	67	1947	2014	4	19	N	I42	N	N	N	N	N	Y	Diseases of the circulatory system
67	M	56	1960	2016	11	27	not available	not available	not available	not available	not available	not available	not available	not available	not available
68	M	30	1980	2010	3	6	Y	J18	N	N	N	N	N	Y	Diseases of the respiratory system
69	M	59	1952	2011	12	7	Y	I21	N	N	N	N	N	Y	Diseases of the circulatory system
70	M	47	1965	2012	12	29	Y	I62	N	N	N	N	N	Y	Diseases of the circulatory system
71	M	60	1950	2010	8	15	N	I25	N	N	N	N	N	Y	Diseases of the circulatory system
72	M	47	1967	2014	12	21	Y	X45	N	Y	N	Y	Y	N	External causes of injury and poisoning
73	M	57	1958	2015	8	11	N	I50	N	N	N	N	N	Y	Diseases of the circulatory system
74	M	57	1953	2010	1	16	Y	X31	Y	Y	N	N	Y	N	External causes of injury and poisoning
75	M	67	1946	2013	3	20	N	J80	N	N	N	N	N	N	Diseases of the respiratory system
76	M	45	1969	2014	8	24	Y	J18	N	N	N	N	N	Y	Diseases of the respiratory system
77	M	56	1957	2013	10	16	Y	Y89	N	Y	N	N	N	N	External causes of injury and poisoning
78	M	52	1959	2011	11	28	Y	X31	Y	Y	N	N	Y	N	External causes of injury and poisoning
79	M	78	1937	2015	11	5	N	I69	N	N	N	N	N	Y	Diseases of the circulatory system
80	F	67	1947	2014	8	30	N	C34	N	N	N	N	N	Y	Neoplasms
81	M	64	1949	2013	7	23	UNK	UNK	UNK	UNK	UNK	UNK	UNK	UNK	UNK
82	F	49	1967	2016	5	8	not available	not available	not available	not available	not available	not available	not available	not available	not available
83	M	58	1953	2011	10	21	UNK	UNK	UNK	UNK	UNK	UNK	UNK	UNK	UNK
84	M	63	1949	2012	2	22	N	J18	N	N	N	N	N	Y	Diseases of the respiratory system
85	F	39	1972	2011	11	29	UNK	UNK	UNK	UNK	UNK	UNK	UNK	UNK	UNK
86	M	65	1948	2013	1	6	N	I99	N	N	N	N	N	N	Diseases of the circulatory system
87	M	63	1950	2013	6	8	N	I33	N	N	N	N	N	Y	Diseases of the circulatory system
88	M	62	1951	2013	12	17	N	I50	N	N	N	N	N	Y	Diseases of the circulatory system
89	M	57	1954	2011	5	30	N	C32	N	N	N	N	N	Y	Neoplasms
90	M	50	1963	2013	12	1	N	K85	N	N	N	Y	Y	N	Diseases of the digestive system
91	M	64	1952	2016	summer	UNK	not available	not available	not available	not available	not available	not available	not available	not available	not available
92	M	42	1974	2016	10	19	not available	not available	not available	not available	not available	not available	not available	not available	not available
93	M	60	1950	2010	8	7	N	C34	N	N	N	N	N	Y	Neoplasms
94	M	63	1951	2014	9	24	Y	J44	N	N	N	N	N	Y	Diseases of the respiratory system
95	M	45	1968	2013	12	16	Y	I42	N	N	N	N	N	Y	Diseases of the circulatory system
96	M	63	1950	2013	1	4	N	C34	N	N	N	N	N	Y	Neoplasms
97	M	45	1971	2016	2	28	not available	not available	not available	not available	not available	not available	not available	not available	not available
98	M	87	1924	2011	4	17	N	J96	N	N	N	N	N	N	Diseases of the respiratory system
99	F	43	1968	2011	1	26	Y	K74	N	N	N	N	N	N	Diseases of the digestive system
100	M	75	1941	2016	2	2	not available	not available	not available	not available	not available	not available	not available	not available	not available
101	M	60	1950	2010	5	24	N	N19	N	N	N	N	N	N	Diseases of the genitourinary system
102	M	58	1954	2012	1	31	Y	Y89	N	Y	N	N	N	N	External causes of injury and poisoning
103	M	29	1981	2010	11	10	Y	I61	N	N	N	N	N	Y	Diseases of the circulatory system
104	M	64	1952	2016	9	28	not available	not available	not available	not available	not available	not available	not available	not available	not available
105	M	51	1959	2010	3	18	Y	I31	N	N	N	N	N	Y	Diseases of the circulatory system
106	M	58	1958	2016	3	21	not available	not available	not available	not available	not available	not available	not available	not available	not available
107	M	67	1949	2016	5	5	not available	not available	not available	not available	not available	not available	not available	not available	not available
108	M	52	1964	2016	3	17	not available	not available	not available	not available	not available	not available	not available	not available	not available
109	M	61	1952	2013	7	4	N	I50	N	N	N	N	N	Y	Diseases of the circulatory system
110	M	61	1952	2013	10	9	N	I51	N	N	N	N	N	Y	Diseases of the circulatory system
111	M	52	1964	2016	1	5	not available	not available	not available	not available	not available	not available	not available	not available	not available
112	M	64	1949	2013	2	28	N	C34	N	N	N	N	N	Y	Neoplasms
113	M	56	1957	2013	2	12	Y	K70	N	N	N	Y	Y	N	Diseases of the digestive system
114	M	45	1965	2010	12	30	N	I46	N	N	N	N	N	Y	Diseases of the circulatory system
115	F	38	1976	2014	10	2	Y	I61	N	N	N	N	N	Y	Diseases of the circulatory system
116	M	57	1954	2011	3	15	N	C15	N	N	N	N	N	Y	Neoplasms
117	M	68	1943	2011	9	19	Y	Y20	N	Y	Y	N	N	N	External causes of injury and poisoning
118	M	52	1958	2010	1	9	Y	X31	Y	Y	N	N	Y	N	External causes of injury and poisoning
119	M	64	1952	2016	9	19	not available	not available	not available	not available	not available	not available	not available	not available	not available
120	M	49	1961	2010	5	25	Y	I46	N	N	N	N	N	Y	Diseases of the circulatory system
121	M	56	1954	2010	autumn	UNK	Y	I25	N	N	N	N	N	Y	Diseases of the circulatory system
122	M	43	1968	2011	7	25	Y	F10	N	N	N	Y	Y	N	Mental and behavioural disorders
123	M	47	1967	2014	10	27	N	A16	N	N	N	N	N	N	Infectious and parasitic diseases
124	F	47	1969	2016	7	16	not available	not available	not available	not available	not available	not available	not available	not available	not available
125	M	60	1951	2011	2	11	Y	I51	N	N	N	N	N	Y	Diseases of the circulatory system
126	M	62	1949	2011	8	20	Y	I60	N	N	N	N	N	Y	Diseases of the circulatory system
127	M	48	1963	2011	1	22	N	I48	N	N	N	N	N	Y	Diseases of the circulatory system
128	M	49	1964	2013	12	30	Y	I26	N	N	N	N	N	Y	Diseases of the circulatory system
129	M	40	1973	2013	4	12	N	J15	N	N	N	N	N	Y	Diseases of the respiratory system
130	M	43	1969	2012	2	1	Y	W17	N	Y	N	N	N	N	External causes of injury and poisoning
131	M	54	1960	2014	2	18	Y	Y15	N	Y	Y	Y	Y	N	External causes of injury and poisoning
132	M	64	1946	2010	4	1	N	E10	N	N	N	N	N	N	Endocrine, nutritional and metabolic diseases
133	M	51	1964	2015	6	26	Y	Y15	N	Y	Y	Y	Y	N	External causes of injury and poisoning
134	M	46	1969	2015	12	23	N	R96	N	N	N	N	N	N	Symptoms, signs, abnormal findings, ill-defined causes
135	F	64	1952	2016	4	9	not available	not available	not available	not available	not available	not available	not available	not available	not available
136	F	54	1960	2014	7	28	Y	K70	N	N	N	Y	Y	N	Diseases of the digestive system
137	M	37	1979	2016	8	24	not available	not available	not available	not available	not available	not available	not available	not available	not available
138	M	36	1975	2011	1	15	Y	I51	N	N	N	N	N	Y	Diseases of the circulatory system
139	M	55	1960	2015	3	29	Y	Y15	N	Y	Y	Y	Y	N	External causes of injury and poisoning
140	M	46	1965	2011	9	14	Y	K56	N	N	N	N	N	N	Diseases of the digestive system
141	M	58	1957	2015	4	3	Y	Y15	N	Y	Y	Y	Y	N	External causes of injury and poisoning
142	M	60	1950	2010	11	21	UNK	Y15	N	Y	Y	Y	Y	N	External causes of injury and poisoning
143	M	38	1975	2013	3	9	UNK	Y15	N	Y	Y	Y	Y	N	External causes of injury and poisoning
144	M	59	1954	2013	3	31	N	I51	N	N	N	N	N	Y	Diseases of the circulatory system
145	M	62	1954	2016	1	27	not available	not available	not available	not available	not available	not available	not available	not available	not available
146	M	49	1961	2010	9	19	UNK	UNK	UNK	UNK	UNK	UNK	UNK	UNK	UNK
147	M	67	1949	2016	11	19	not available	not available	not available	not available	not available	not available	not available	not available	not available
148	F	52	1963	2015	4	18	Y	K85	N	N	N	Y	Y	N	Diseases of the digestive system
149	M	53	1957	2010	11	29	Y	I50	N	N	N	N	N	Y	Diseases of the circulatory system
150	F	61	1951	2012	9	5	N	I61	N	N	N	N	N	Y	Diseases of the circulatory system
151	M	51	1960	2011	12	16	Y	I42	N	N	N	N	N	Y	Diseases of the circulatory system
152	M	73	1940	2013	9	30	N	C25	N	N	N	N	N	Y	Neoplasms
153	M	62	1948	2010	1	13	N	I21	N	N	N	N	N	Y	Diseases of the circulatory system
154	M	53	1957	2010	12	24	Y	Y15	N	Y	Y	Y	Y	N	External causes of injury and poisoning
155	M	35	1980	2015	10	19	Y	X70	N	Y	Y	N	N	N	External causes of injury and poisoning
156	M	53	1961	2014	8	25	Y	K70	N	N	N	Y	Y	N	Diseases of the digestive system
157	M	59	1953	2012	3	27	N	J44	N	N	N	N	N	Y	Diseases of the respiratory system
158	M	49	1964	2013	2	6	Y	J85	N	N	N	N	N	N	Diseases of the respiratory system
159	M	61	1952	2013	6	7	Y	I26	N	N	N	N	N	Y	Diseases of the circulatory system
160	M	54	1958	2012	11	22	N	I46	N	N	N	N	N	Y	Diseases of the circulatory system
161	M	68	1947	2015	9	28	Y	I26	N	N	N	N	N	Y	Diseases of the circulatory system
162	M	71	1940	2011	1	3	UNK	UNK	UNK	UNK	UNK	UNK	UNK	UNK	UNK
163	M	57	1956	2013	12	13	Y	Y15	N	Y	Y	Y	Y	N	External causes of injury and poisoning
164	M	54	1962	2016	7	23	not available	not available	not available	not available	not available	not available	not available	not available	not available
165	M	62	1948	2010	7	21	N	E11	N	N	N	N	N	N	Endocrine, nutritional and metabolic diseases
166	M	59	1956	2015	3	26	N	J22	N	N	N	N	N	N	Diseases of the respiratory system
167	M	67	1947	2014	2	25	UNK	UNK	UNK	UNK	UNK	UNK	UNK	UNK	UNK
168	M	62	1952	2014	12	31	UNK	J15	N	N	N	N	N	Y	Diseases of the respiratory system
169	M	68	1947	2015	11	23	Y	I42	N	N	N	N	N	Y	Diseases of the circulatory system
170	M	72	1941	2013	5	9	N	J44	N	N	N	N	N	Y	Diseases of the respiratory system
171	M	68	1947	2015	10	14	Y	K70	N	N	N	Y	Y	N	Diseases of the digestive system
172	M	29	1981	2010	3	25	Y	F10	N	N	N	Y	Y	N	Mental and behavioural disorders
173	M	62	1951	2013	10	10	N	D38	N	N	N	N	N	N	Neoplasms
174	M	64	1950	2014	4	22	Y	I25	N	N	N	N	N	Y	Diseases of the circulatory system
175	M	72	1941	2013	8	8	N	C19	N	N	N	N	N	N	Neoplasms
176	F	59	1951	2010	10	29	N	C50	N	N	N	N	N	N	Neoplasms

## Sheet: Meteo
date	T min	T max	T average	UTCI
2010-01-01	-7.2	-3	-4.4	-10.761
2010-01-02	-6.4	-4	-5.5	-17.5581
2010-01-03	-15.1	-6.4	-11.3	-18.9977
2010-01-04	-16.6	-6.1	-8.6	-16.4341
2010-01-05	-8.3	-4.9	-6.9	-14.9943
2010-01-06	-11.5	-6.8	-8.5	-18.8638
2010-01-07	-7.7	-5.8	-6.9	-11.4306
2010-01-08	-9.2	-6	-7.2	-11.8338
2010-01-09	-7.1	-4	-5.1	-19.9055
2010-01-10	-8.4	-4.6	-7	-16.7861
2010-01-11	-6.7	-5.7	-6.1	-12.4307
2010-01-12	-6.1	-3.8	-4.9	-7.54479
2010-01-13	-10.8	-3.9	-7.6	-9.88459
2010-01-14	-16.4	-8	-12	-16.7661
2010-01-15	-14.1	-8.7	-12.7	-17.8762
2010-01-16	-17.3	-7.2	-11.6	-20.8193
2010-01-17	-9.9	-5.8	-6.8	-21.9999
2010-01-18	-5.9	-3.9	-4.4	-17.7674
2010-01-19	-9.1	-4.3	-8.2	-17.8779
2010-01-20	-12	-8.1	-9.7	-19.8965
2010-01-21	-10.8	-8.1	-9.6	-21.8211
2010-01-22	-14.8	-8.6	-12.8	-15.8245
2010-01-23	-17.9	-12.9	-16	-20.7496
2010-01-24	-23.6	-11.3	-17.7	-20.4972
2010-01-25	-21.3	-13.8	-18.4	-21.7853
2010-01-26	-25.3	-10.7	-17.7	-19.3837
2010-01-27	-14.5	-8.6	-11.2	-20.0179
2010-01-28	-12.4	-0.8	-4.8	-17.3224
2010-01-29	-4.5	-2.9	-3.8	-11.4721
2010-01-30	-5.3	0	-2.2	-16.5697
2010-01-31	-10.1	-1.7	-6.2	-8.89509
2010-02-01	-15.4	-4.9	-9.3	-11.5184
2010-02-02	-5.7	-1.3	-2.5	-11.2094
2010-02-03	-5	0.4	-3.3	-20.1232
2010-02-04	-7.4	0.7	-2.7	-5.64464
2010-02-05	-7.5	-2.6	-5.6	-14.0314
2010-02-06	-9.7	-4.7	-6.3	-23.0986
2010-02-07	-11.4	-6.2	-8.9	-14.3883
2010-02-08	-12.2	-4.8	-8.2	-5.93271
2010-02-09	-10.4	-3.9	-7.4	-10.7478
2010-02-10	-8.3	-4.9	-6.8	-14.2387
2010-02-11	-7.7	-3.7	-5.7	-13.542
2010-02-12	-3.7	-1.6	-2.8	-10.1083
2010-02-13	-4.2	-1.7	-3.4	-7.28602
2010-02-14	-5.3	-3.6	-4.8	-14.3453
2010-02-15	-6.1	-3.5	-4.9	-8.84488
2010-02-16	-4.9	-2.9	-4	-6.47435
2010-02-17	-4.9	-1.6	-3.6	-13.7446
2010-02-18	-3.4	0.2	-1.5	-10.7038
2010-02-19	-0.2	4.7	2.3	-5.73887
2010-02-20	0.5	2.5	0.9	-11.6398
2010-02-21	-4	1.6	-1.1	-6.80166
2010-02-22	-8.8	3	-1.9	-10.3915
2010-02-23	-0.5	5.4	2.1	-5.38741
2010-02-24	-2	1.9	-0.6	-5.53444
2010-02-25	-0.9	3.7	1.3	-2.70103
2010-02-26	0.8	3.6	1.9	-5.60271
2010-02-27	1.7	4.2	2.5	0.388222
2010-02-28	-0.2	8.1	3.4	-7.56333
2010-03-01	1.6	7.5	3.8	-16.9627
2010-03-02	0.1	3.1	1.3	-14.1269
2010-03-03	-3.8	0.9	-1.4	-8.23056
2010-03-04	-4.8	0.8	-2.7	-9.23291
2010-03-05	-7.2	-1.1	-4.1	-4.43584
2010-03-06	-6.2	-3.3	-5.3	-10.9861
2010-03-07	-12.5	0	-5.7	-6.19878
2010-03-08	-11.1	0.1	-5.3	-3.21941
2010-03-09	-10.2	0.2	-4.7	-10.7755
2010-03-10	-10.9	3.6	-3.5	-6.69982
2010-03-11	-9.5	4.2	-3.3	-0.77856
2010-03-12	-11.4	-0.8	-4.8	-11.0848
2010-03-13	-3.2	1.6	-0.6	-7.80856
2010-03-14	-2.1	3.9	-0.2	-6.87117
2010-03-15	-7.9	1.4	-2.9	-9.25013
2010-03-16	-8.2	1.9	-2.3	-4.18214
2010-03-17	-4.2	2.1	-0.7	-10.6555
2010-03-18	1.2	6.4	3.5	-0.0469515
2010-03-19	2.8	11.4	7.6	-1.14985
2010-03-20	6.2	11.5	8.7	4.85863
2010-03-21	5.4	14.1	9.4	-6.17026
2010-03-22	0.8	5.4	3.7	-8.32639
2010-03-23	2.4	10.8	5.6	-1.20392
2010-03-24	2.5	10.6	5.4	-2.25066
2010-03-25	0.7	16.7	9	0.147256
2010-03-26	8.8	19.8	13.8	9.75186
2010-03-27	5.3	14.4	7.9	-3.05144
2010-03-28	6	10.2	7.4	2.73264
2010-03-29	4.8	11	7.4	6.04379
2010-03-30	5.3	13	9.2	6.98929
2010-03-31	8.3	18.8	13	4.20629
2010-04-01	4.5	14.6	8.8	3.21903
2010-04-02	-1	12.8	6.1	-1.08562
2010-04-03	0.8	8.7	5	4.68049
2010-04-04	1.2	15.8	9.8	7.50911
2010-04-05	6.3	15.5	10.2	1.08331
2010-04-06	3.4	7.8	4.6	-5.02826
2010-04-07	0.5	11.1	4.5	-3.46848
2010-04-08	-1.4	15	6.7	5.53444
2010-04-09	3.7	10.1	6.8	1.36154
2010-04-10	3.1	7.3	5.3	0.985799
2010-04-11	3.8	14.5	8.4	3.40527
2010-04-12	2.8	16.4	9.7	10.0562
2010-04-13	1.5	14.1	7.1	0.989589
2010-04-14	1.3	15.5	9.2	1.93584
2010-04-15	2.7	17.7	10.4	8.22938
2010-04-16	2	13.5	6.9	-3.30404
2010-04-17	-0.5	13.1	7.4	2.98751
2010-04-18	5.2	17.6	10.8	5.85832
2010-04-19	2.6	14.8	7.7	7.50165
2010-04-20	-3	10.9	4.7	7.11488
2010-04-21	2.7	10.2	5.7	2.5085
2010-04-22	0.3	7.2	3.8	-5.64618
2010-04-23	0.5	11	5.9	3.73118
2010-04-24	3.9	10.4	6.1	1.4182
2010-04-25	-4.2	13.8	6.4	9.13235
2010-04-26	0.1	18.1	10.7	8.21553
2010-04-27	8	15.1	10.4	-3.3383
2010-04-28	7.6	13.1	9.3	2.92703
2010-04-29	3.6	18	12.3	8.46335
2010-04-30	8.8	24.9	17	14.6851
2010-05-01	8.2	16.4	12	15.2868
2010-05-02	10.4	17	12.7	13.9886
2010-05-03	7	16.1	11.6	4.60964
2010-05-04	4.8	14.6	5.9	-0.53316
2010-05-05	4.6	11	7.3	5.30121
2010-05-06	3.1	8.6	5.8	-2.01038
2010-05-07	6.9	20.1	12.8	11.485
2010-05-08	9.7	17.6	12.7	6.87303
2010-05-09	6.7	14.4	9.3	6.27509
2010-05-10	6.7	15.1	11.5	11.3213
2010-05-11	7.9	15.2	10.9	4.95882
2010-05-12	8.4	23.1	16.3	14.1973
2010-05-13	10.3	21.8	14.7	4.90465
2010-05-14	7	11.9	9.2	4.56518
2010-05-15	8.5	11.5	9.8	6.01637
2010-05-16	6.2	15.9	10.6	-1.21826
2010-05-17	7.8	11.5	9.1	-4.79092
2010-05-18	7.5	10.7	9.4	-1.72176
2010-05-19	8.4	20.6	14.1	8.85232
2010-05-20	11.5	21	14.8	14.2048
2010-05-21	9.8	23.4	16.3	13.1121
2010-05-22	9.7	22.5	14.4	11.4683
2010-05-23	7.9	22	15.8	13.7778
2010-05-24	10.7	18	12.5	7.8918
2010-05-25	8.4	12.8	9.8	7.43961
2010-05-26	5.9	14.7	10.1	1.98978
2010-05-27	3	15.5	10.8	10.0924
2010-05-28	8.9	16.7	12.2	4.56776
2010-05-29	10.6	17.7	13.6	10.288
2010-05-30	6.8	20	14.4	13.0587
2010-05-31	13.3	17.2	14.2	11.9454
2010-06-01	11.8	15.7	13.7	14.7662
2010-06-02	14	21	16.9	17.1036
2010-06-03	15.5	24	18.4	21.8506
2010-06-04	11.8	21.3	15.9	17.9476
2010-06-05	5.4	22.4	15.4	23.9978
2010-06-06	15.3	23.9	19.8	21.1784
2010-06-07	13.7	26.2	18.5	23.0024
2010-06-08	13.8	19.3	15.7	21.3887
2010-06-09	10.2	25.2	17.8	30.1596
2010-06-10	16.1	30.5	23.8	30.5575
2010-06-11	17.9	31.7	23.9	31.524
2010-06-12	16	22.5	18.4	21.9849
2010-06-13	11.2	17.3	13.1	13.4627
2010-06-14	10.7	14.1	12.3	16.4254
2010-06-15	8.3	17.1	12.7	20.5514
2010-06-16	6.7	17	12	15.79
2010-06-17	5	20.4	14.2	26.2789
2010-06-18	7.4	23	17.3	22.3359
2010-06-19	10.4	20.7	13.4	19.5153
2010-06-20	5.5	18	13.5	23.1562
2010-06-21	10.3	17.3	13.9	14.3965
2010-06-22	9.5	18.1	13.5	12.5347
2010-06-23	7.7	17	12.1	12.8394
2010-06-24	11.9	14	12.7	7.77373
2010-06-25	12.1	13.1	12.7	14.8749
2010-06-26	9.3	20.5	15	19.3413
2010-06-27	8.7	22.5	16.5	25.2037
2010-06-28	9.7	24	18.1	28.9973
2010-06-29	10.3	26	19.4	32.1212
2010-06-30	11.9	27.4	20.8	32.8468
2010-07-01	14.9	23.7	18.6	27.9703
2010-07-02	11.3	24.2	18.3	26.7956
2010-07-03	9.8	24.5	19	28.9828
2010-07-04	12.7	25.6	20.3	25.196
2010-07-05	16.2	28.1	22.6	32.8053
2010-07-06	15.6	26.3	19.2	25.8183
2010-07-07	13.9	20.6	16.5	15.4796
2010-07-08	11	23.9	17.6	25.1944
2010-07-09	9.9	27.5	20.3	36.2816
2010-07-10	14.6	30.8	23.9	35.9815
2010-07-11	16.5	31.2	25	35.3827
2010-07-12	17.8	31.4	25.6	34.9139
2010-07-13	18.9	31	24.8	31.2461
2010-07-14	18.9	26.6	22.2	28.0191
2010-07-15	17.7	31.7	24.9	35.61
2010-07-16	20.9	30.7	24.7	36.5185
2010-07-17	20	33.5	27.1	37.0306
2010-07-18	18.9	30.6	20.6	16.3809
2010-07-19	14.7	23.9	18.8	19.5771
2010-07-20	15.3	25.1	20.5	30.3701
2010-07-21	14.8	29.5	23.4	35.1391
2010-07-22	20.5	33.3	27.1	36.8653
2010-07-23	20.6	32.3	23.4	30.1473
2010-07-24	19.3	27.6	22.2	22.3707
2010-07-25	13.8	23	15.7	15.1302
2010-07-26	12.4	16.6	14.9	13.5336
2010-07-27	14.7	18.2	16.4	12.9632
2010-07-28	16.5	23.6	18.7	25.6496
2010-07-29	15	20.5	16.5	23.9691
2010-07-30	11.6	22.7	17.6	22.3694
2010-07-31	14.7	25	20.7	30.6617
2010-08-01	15.7	26.5	21.3	31.5585
2010-08-02	15.7	28.6	22.4	30.3686
2010-08-03	17	27.8	20.3	23.3517
2010-08-04	15.3	21.8	17.9	25.1921
2010-08-05	12	24.3	18.5	29.5122
2010-08-06	14.6	27.3	21.3	27.4371
2010-08-07	18	25.7	21.4	31.4216
2010-08-08	16.4	25	19	18.799
2010-08-09	14.4	26.5	19.6	27.7757
2010-08-10	13.8	24.9	18.7	27.2818
2010-08-11	15.3	26	20.9	30.0786
2010-08-12	15.4	28.7	22.4	29.173
2010-08-13	19.5	30	24.5	31.6878
2010-08-14	17.5	31.2	24.6	32.8329
2010-08-15	18.3	31.5	24.4	36.4855
2010-08-16	19.2	30.5	24.4	33.5177
2010-08-17	17.2	25.4	19.8	24.8367
2010-08-18	15.1	20.7	16.6	16.0931
2010-08-19	14.3	19.7	16	18.9501
2010-08-20	14.4	21.4	16.6	20.9603
2010-08-21	11.7	25.5	19	29.464
2010-08-22	15.6	28.4	21.7	27.0757
2010-08-23	16.3	23.5	19.7	24.4533
2010-08-24	18.5	24.5	20	23.5908
2010-08-25	13	19	15.5	14.6111
2010-08-26	12	18.9	14.7	16.5073
2010-08-27	10.7	15.4	14	13.5629
2010-08-28	12.5	18.1	14.3	13.0357
2010-08-29	10.7	15.8	12.2	14.4742
2010-08-30	8.1	17.9	13	14.5803
2010-08-31	11.1	19.2	14.6	18.0197
2010-09-01	10.1	17	13	6.03835
2010-09-02	10.3	16.7	12.3	7.89383
2010-09-03	8.2	13.7	10.2	-1.12778
2010-09-04	5.3	16.7	10	15.219
2010-09-05	2.7	15.4	9.4	10.4313
2010-09-06	5.7	12.6	10.1	4.35774
2010-09-07	8.7	18.3	13.2	11.9036
2010-09-08	8	18.7	12.9	12.7252
2010-09-09	8.7	17.2	12.6	4.23471
2010-09-10	11.5	18.6	14.5	9.13119
2010-09-11	13.9	19.8	15.5	16.5065
2010-09-12	8.9	19.9	13.7	8.72215
2010-09-13	12.9	19.2	15.8	13.4547
2010-09-14	12.6	16.5	14.1	8.0537
2010-09-15	11.9	15.2	12.9	7.69603
2010-09-16	9.4	15.7	11	5.61253
2010-09-17	8.2	14.7	11.1	8.86325
2010-09-18	8.1	14.6	10.3	8.10232
2010-09-19	6.5	14.1	9.8	1.73711
2010-09-20	8.2	16.3	12.6	7.70487
2010-09-21	10.7	16.7	12.8	7.33268
2010-09-22	7.6	15.7	10	7.38999
2010-09-23	2.8	18.8	11.1	13.4446
2010-09-24	8.5	21.6	14.7	12.1694
2010-09-25	10.3	22	15.2	12.9601
2010-09-26	11.1	18.9	15	9.11021
2010-09-27	11.8	16.4	14	5.9193
2010-09-28	10	12.7	11.1	8.19717
2010-09-29	4.6	11.7	6	-3.95015
2010-09-30	2.4	8.2	6.1	-4.48389
2010-10-01	2.9	10.6	6.5	4.04263
2010-10-02	-0.2	12.5	6	8.78698
2010-10-03	2.1	13.7	8.2	6.31293
2010-10-04	5.2	13.2	8.8	2.28502
2010-10-05	3.2	11.7	7.5	-0.0701103
2010-10-06	4.2	12.3	7.7	-2.41823
2010-10-07	1.7	10.2	5.3	0.415472
2010-10-08	-0.8	10.1	4.2	-2.76477
2010-10-09	-2.1	13.6	4.8	6.67561
2010-10-10	-1.7	14.2	4.8	7.05727
2010-10-11	1.8	10.1	6.7	1.90315
2010-10-12	0.6	10.1	5.3	0.0085775
2010-10-13	-0.8	10.1	5.1	6.04485
2010-10-14	5.5	9.2	6.9	-0.200286
2010-10-15	0.6	8.9	4.3	5.43483
2010-10-16	-3.6	8.6	1.5	1.12922
2010-10-17	-5.6	8.8	0.8	1.74097
2010-10-18	-5.6	7.9	0.7	2.72554
2010-10-19	-0.9	7.8	4.6	-2.17291
2010-10-20	4.1	8.6	5.8	3.95066
2010-10-21	0.2	6	2.7	-16.3497
2010-10-22	-0.4	6.8	4.5	-10.4982
2010-10-23	3.8	10.4	6.4	2.93522
2010-10-24	3.6	10.7	7.4	1.41987
2010-10-25	3.7	8.9	6.1	-0.511724
2010-10-26	-2.1	4.3	1.6	-1.60942
2010-10-27	-1.5	8.1	2.6	2.47426
2010-10-28	2.2	8.4	5.7	-0.700794
2010-10-29	6.5	10.3	8.1	3.40611
2010-10-30	4.6	12.9	7.6	0.660265
2010-10-31	1.3	13.5	6.4	-1.61508
2010-11-01	4.9	15.8	8.6	4.16026
2010-11-02	2.9	12.3	7.4	5.6043
2010-11-03	7	10.4	8.9	0.210403
2010-11-04	6.4	10.8	7.9	0.257749
2010-11-05	8.2	12.3	10.4	-2.1686
2010-11-06	5.5	10.1	6.4	-10.204
2010-11-07	3.2	6.8	3.8	-1.43093
2010-11-08	2.4	7.1	4.2	-4.93195
2010-11-09	3.8	10.5	6.6	-3.91636
2010-11-10	-0.2	5.6	4.1	-4.86299
2010-11-11	3	6.5	4.8	0.678065
2010-11-12	1.8	8.2	5.7	-9.33833
2010-11-13	7.3	10.6	9.2	-1.41982
2010-11-14	8.4	12.9	10.3	6.55073
2010-11-15	6.6	13.4	9.5	4.39231
2010-11-16	5.6	8.6	6.4	-1.56669
2010-11-17	3.2	5.6	4.4	-9.12594
2010-11-18	4.9	8.2	7	2.73346
2010-11-19	6.2	9	7.5	-0.618719
2010-11-20	3.7	6.3	3.9	-3.90645
2010-11-21	2.3	4.3	3	-0.291927
2010-11-22	1.3	5.4	3.8	-10.7707
2010-11-23	3	5.2	3.8	-3.50653
2010-11-24	1.3	4	2.1	-6.53532
2010-11-25	-0.4	1.5	-0.1	-13.285
2010-11-26	-4.1	2	-1.2	-6.47104
2010-11-27	-4.3	0.2	-1.2	-7.69645
2010-11-28	-3.8	-1.1	-3.2	-8.73195
2010-11-29	-10.5	-2.9	-7.4	-24.3466
2010-11-30	-13.4	-10.2	-11.8	-22.5526
2010-12-01	-19.2	-12.9	-15.1	-25.2804
2010-12-02	-13.4	-8.4	-9.7	-27.0355
2010-12-03	-14.3	-8.1	-11	-15.4727
2010-12-04	-11.6	-5.1	-7.6	-13.5903
2010-12-05	-11.9	-5.2	-7.7	-17.0975
2010-12-06	-5.6	-0.3	-1.1	-9.49197
2010-12-07	-3	-0.3	-1.9	-6.16104
2010-12-08	-5	-1.7	-3.1	-10.278
2010-12-09	-4.5	-0.2	-2.1	-18.0615
2010-12-10	-4.3	-0.7	-2.6	-17.051
2010-12-11	-6.8	-1.3	-3.5	-17.709
2010-12-12	-4.9	0.7	-1.8	-16.0239
2010-12-13	-9.8	-4.9	-7.8	-16.4633
2010-12-14	-17.3	-9.8	-13.4	-16.7365
2010-12-15	-16.5	-9.3	-11.8	-15.9767
2010-12-16	-10.9	-9	-10	-20.1106
2010-12-17	-13.5	-9.2	-10.9	-23.399
2010-12-18	-9.3	-7.7	-8.5	-17.2534
2010-12-19	-11.3	-6.5	-10	-17.8966
2010-12-20	-13.8	-4	-6.6	-16.6972
2010-12-21	-8.5	-4.6	-7.5	-17.0999
2010-12-22	-8.4	-3.1	-5	-9.09594
2010-12-23	-3.6	-1.9	-2.5	-13.0908
2010-12-24	-2	2	0.4	-3.26301
2010-12-25	-1.8	-0.1	-1.4	-10.0461
2010-12-26	-5.9	-1.1	-4.5	-17.2685
2010-12-27	-14.6	-5.8	-11.4	-13.1767
2010-12-28	-19.4	-9.8	-14	-15.0037
2010-12-29	-12.7	-3.5	-7	-18.5697
2010-12-30	-5.3	-1.2	-3.5	-21.0831
2010-12-31	-9.2	-2.2	-5.3	-16.817
2011-01-01	-3.4	1.3	-0.1	-18.3918
2011-01-02	-2.3	-0.3	-1.7	-14.5438
2011-01-03	-3.5	-1.9	-2.9	-9.43546
2011-01-04	-6.2	-3.1	-4.4	-12.2883
2011-01-05	-6.5	-2.7	-4.6	-11.8259
2011-01-06	-7.9	-2.4	-5	-18.4648
2011-01-07	-2.4	3.5	1.7	-6.91497
2011-01-08	0.7	2.9	2.3	-3.22965
2011-01-09	2.3	5.4	3.6	-4.98199
2011-01-10	-2	4.7	0.2	-1.82235
2011-01-11	-5.7	0	-2.2	-9.61279
2011-01-12	0	1.7	1	-4.65074
2011-01-13	-0.5	1.7	0.7	-4.98312
2011-01-14	-0.7	0.7	0.3	-4.98804
2011-01-15	-0.3	1.3	0.5	-3.36226
2011-01-16	-0.6	4.1	2.3	-2.25976
2011-01-17	4	6.3	4.9	-1.40087
2011-01-18	1.4	5.5	2.9	-9.81059
2011-01-19	0.6	2.9	1.1	-4.23338
2011-01-20	-1.2	0.7	-0.5	-8.24201
2011-01-21	-1.8	-0.4	-1.1	-8.55529
2011-01-22	-2.8	-1.2	-1.9	-9.95598
2011-01-23	-3.3	-0.7	-1.9	-11.2558
2011-01-24	-10	-3.3	-6.2	-8.72196
2011-01-25	-7.1	-1.4	-3.1	-12.5932
2011-01-26	-1.5	0.6	-0.6	-4.54459
2011-01-27	-7.7	-1.5	-5.6	-9.85434
2011-01-28	-11.4	-6.1	-10	-15.1828
2011-01-29	-11.8	-3.6	-5.4	-15.7767
2011-01-30	-5.4	0.1	-2.3	-8.21361
2011-01-31	-9.3	-2.5	-5.6	-10.4053
2011-02-01	-5.5	-2.2	-4.2	-12.1826
2011-02-02	-6.1	0.6	-2.5	-13.6082
2011-02-03	-0.2	1.3	0.6	-10.0569
2011-02-04	-0.1	2.6	1.5	-12.3837
2011-02-05	2.4	7.6	6	-8.73725
2011-02-06	2.3	6.5	3.7	-3.84347
2011-02-07	1.6	6.6	5.1	-3.12619
2011-02-08	3.7	6.4	4.9	-13.12
2011-02-09	0	4.7	1.9	-11.614
2011-02-10	-5.8	0.3	-2.1	-10.406
2011-02-11	-1	3.7	2	-5.67684
2011-02-12	-6.6	1.9	-3.9	-17.7455
2011-02-13	-11.1	-1.5	-5.9	-9.10904
2011-02-14	-13.7	-4.8	-11.3	-12.0348
2011-02-15	-15.7	-7.2	-11.9	-17.6329
2011-02-16	-12.9	-4.9	-9.1	-19.4608
2011-02-17	-10	-3.4	-6.7	-16.1988
2011-02-18	-7	-4.8	-6.3	-13.2957
2011-02-19	-12.6	-6.6	-9.2	-16.323
2011-02-20	-15.6	-10.4	-12.9	-21.0274
2011-02-21	-20.3	-8.1	-15.6	-16.1506
2011-02-22	-21.3	-9.2	-15.7	-16.7295
2011-02-23	-21.3	-9.2	-16.3	-16.8724
2011-02-24	-23.2	-6.5	-15.6	-16.3705
2011-02-25	-20.9	-5	-13.1	-13.8494
2011-02-26	-17.6	-3.5	-9.6	-15.2136
2011-02-27	-9.6	-2.6	-5.8	-16.3613
2011-02-28	-9.5	1.4	-4.7	-11.8663
2011-03-01	-14.1	2.2	-6.3	-8.24536
2011-03-02	-13.9	3.5	-5.4	-6.48103
2011-03-03	-10.8	7.1	-2.8	-5.446
2011-03-04	-7.2	2.7	-2.5	-7.7482
2011-03-05	-1.3	1.5	0.1	-7.68514
2011-03-06	-4.2	0.2	-2.5	-18.3576
2011-03-07	-7	1.7	-2.5	-5.57543
2011-03-08	-2	4.6	0.3	-5.71599
2011-03-09	-3.1	5.8	1.9	-2.77401
2011-03-10	0.6	8.2	4.1	-1.1643
2011-03-11	3.5	6.8	4.4	-11.7887
2011-03-12	0	9.9	4.7	4.15674
2011-03-13	0.2	14.4	6.5	2.99954
2011-03-14	3.2	14.4	7.7	2.75653
2011-03-15	1.9	7.2	3.3	-1.99081
2011-03-16	-2.9	5.3	0.9	-6.15601
2011-03-17	0.1	5.9	2.4	-15.5367
2011-03-18	0.2	3.1	0.7	-6.63949
2011-03-19	-0.2	2.2	0.5	-10.2755
2011-03-20	-2.1	6.4	1.6	-1.89889
2011-03-21	-1.3	9.3	3.5	-5.82221
2011-03-22	5	13.4	9	0.644732
2011-03-23	3.3	10.1	6.6	-4.22477
2011-03-24	4.8	8.3	6.1	-3.63456
2011-03-25	0.3	7.2	3.1	-5.24967
2011-03-26	-3.4	3	-1.1	0.745019
2011-03-27	-8.5	4.9	-0.7	1.0538
2011-03-28	-1.5	7.1	2.8	-1.30866
2011-03-29	-1.7	8	3.2	-3.56006
2011-03-30	1.3	9.6	5.8	3.15256
2011-03-31	3.3	17	9.9	2.77416
2011-04-01	6.6	13.8	8.9	0.314395
2011-04-02	5.4	14.2	8.7	4.69843
2011-04-03	4.5	16.9	10.4	1.01249
2011-04-04	6.1	13.6	8.4	-2.70644
2011-04-05	3.8	13.5	8.7	7.33942
2011-04-06	7.5	11.3	9.7	1.89526
2011-04-07	7.9	17.6	11.2	-6.76768
2011-04-08	4.7	9.8	6.4	-11.443
2011-04-09	3.3	7.2	4.3	-19.3521
2011-04-10	2.1	7.9	4.3	-3.43856
2011-04-11	-0.5	9.1	4.2	-1.14197
2011-04-12	3.9	10.8	7.9	2.78123
2011-04-13	4.1	8.6	4.8	0.311302
2011-04-14	2.5	8.9	4.3	-6.25128
2011-04-15	1.5	6.7	3.1	-4.94226
2011-04-16	-2.7	13	7	7.22311
2011-04-17	7.4	16.2	10.9	4.72155
2011-04-18	3.5	15.7	9.2	8.61481
2011-04-19	1.7	14	7.6	8.7578
2011-04-20	-1.7	17.7	8.9	14.3706
2011-04-21	1.5	19.2	11.5	17.2165
2011-04-22	3	20	12.6	18.1481
2011-04-23	6.5	18.6	12.1	15.2676
2011-04-24	5	18.5	11.8	6.06107
2011-04-25	8.9	22	15.3	16.1734
2011-04-26	4.9	23.2	15.4	19.1199
2011-04-27	6	23.4	15.5	21.7664
2011-04-28	6.3	23.6	15.7	20.8813
2011-04-29	7	21.3	14.2	15.6055
2011-04-30	6.5	17.1	11.7	9.19012
2011-05-01	5.3	11.9	7.7	2.4105
2011-05-02	3.4	6.8	4.3	-4.73033
2011-05-03	-1.4	6.9	2.6	-5.81207
2011-05-04	-1.7	9.8	4.2	1.25904
2011-05-05	0.5	8.7	4.1	-0.508187
2011-05-06	-1.5	14.3	7.2	6.38319
2011-05-07	-1.1	16.5	9.2	5.66288
2011-05-08	9.9	19.1	13.2	7.99755
2011-05-09	5	23.5	15.6	19.9206
2011-05-10	8.2	25.1	17.7	23.5678
2011-05-11	5.7	25.1	17.1	27.1909
2011-05-12	7.9	25.3	16.9	17.524
2011-05-13	8.9	14.8	11.4	-6.6683
2011-05-14	7.4	17.7	12.6	10.985
2011-05-15	7.6	14.9	9.7	4.38643
2011-05-16	6.2	14.9	10.1	9.4797
2011-05-17	8.5	15.5	12.6	8.66934
2011-05-18	11.9	17.4	14.3	7.89749
2011-05-19	12.7	25.6	18.4	21.7415
2011-05-20	10.7	24.3	18.1	19.8777
2011-05-21	13.6	22.4	17	16.9336
2011-05-22	9.7	24.8	17.7	19.7035
2011-05-23	12.1	19.2	15.7	6.88
2011-05-24	7.8	24.8	15.6	-0.521623
2011-05-25	7.3	15.7	11.3	5.69159
2011-05-26	4.9	20.6	14.3	18.2401
2011-05-27	12.6	20.8	16.2	13.2269
2011-05-28	11.8	17.6	14.5	10.5308
2011-05-29	11.3	21	15.7	15.4782
2011-05-30	12.3	27.1	20.8	22.2191
2011-05-31	16.8	30.2	23.9	19.9037
2011-06-01	14.4	29.3	18.5	26.9477
2011-06-02	11.1	23	16.5	17.6722
2011-06-03	7.4	23.1	16.3	22.9421
2011-06-04	9.7	25.8	19.1	30.0053
2011-06-05	11.9	28.8	21.9	29.4047
2011-06-06	16.2	30.9	24.3	26.3341
2011-06-07	19	27.5	21.9	22.3044
2011-06-08	15.2	30.7	22.4	28.6232
2011-06-09	14.5	22.9	17.8	22.6866
2011-06-10	12.2	14.5	12.7	10.8408
2011-06-11	10.4	17.6	13.9	15.982
2011-06-12	9.4	20.2	14.9	13.7699
2011-06-13	9	20.4	15.4	26.4788
2011-06-14	9.5	25.3	18.3	26.7359
2011-06-15	12.1	21.2	16.6	22.977
2011-06-16	9.6	22.9	17.2	21.6032
2011-06-17	14.1	22.5	17.3	20.4799
2011-06-18	11.2	18.7	15	20.7681
2011-06-19	14	20.7	16.8	21.1984
2011-06-20	10	17.8	13	14.4556
2011-06-21	10.9	21.1	15.9	29.1266
2011-06-22	10.5	24.5	19.2	28.3326
2011-06-23	15.7	22.5	18.7	25.5085
2011-06-24	12.8	19.9	14.5	19.5915
2011-06-25	10.1	16.7	12.5	19.8684
2011-06-26	8.7	18.7	13.8	14.2382
2011-06-27	8.9	21.8	15.9	17.5479
2011-06-28	10.5	23.4	17.8	22.7837
2011-06-29	13.6	27.3	21.5	29.8273
2011-06-30	18.3	25.9	21.1	27.2266
2011-07-01	11.4	23.8	14.3	6.85483
2011-07-02	11.1	14	13.1	11.0476
2011-07-03	11.7	17.4	14.2	22.2223
2011-07-04	11.9	17.9	14.9	17.5631
2011-07-05	11.9	23	17.5	22.1127
2011-07-06	16.2	19.7	17.7	13.9367
2011-07-07	15.8	18.8	16.9	14.7694
2011-07-08	15.7	25.7	19.9	28.0873
2011-07-09	17.5	24.6	20.1	32.5012
2011-07-10	14.8	27.5	21	26.2503
2011-07-11	16.4	25.1	19.2	28.323
2011-07-12	13.5	22.4	17.9	26.633
2011-07-13	12.8	25.3	20.4	24.5899
2011-07-14	17.3	25.7	20.6	23.3917
2011-07-15	14.5	23.5	18.8	24.6464
2011-07-16	12.8	21.4	16.9	28.2552
2011-07-17	11.5	25.2	19.9	25.4506
2011-07-18	17	25.5	19.6	25.9191
2011-07-19	14.7	24.3	20	24.5406
2011-07-20	17.6	24.3	20.4	23.5854
2011-07-21	17	27.4	21.5	26.9221
2011-07-22	17.5	22.8	18.9	22.3245
2011-07-23	13.6	19.6	14.2	14.9408
2011-07-24	9.9	22.7	16.8	21.1898
2011-07-25	15.2	21.3	17.1	25.42
2011-07-26	14.9	21.6	18	22.1829
2011-07-27	15.2	18.3	16.2	15.4199
2011-07-28	16	19.7	17.4	20.5051
2011-07-29	15.5	20.3	17.4	21.6366
2011-07-30	14.2	20.1	17	22.0936
2011-07-31	16.6	22.7	19	18.6822
2011-08-01	15.8	23.1	19.4	23.7058
2011-08-02	14.7	23.1	18.6	22.8508
2011-08-03	11.7	22.7	16.7	26.2131
2011-08-04	9.8	24	17.6	28.9157
2011-08-05	9.8	25.2	19.1	25.7777
2011-08-06	17	25.9	20.7	25.7844
2011-08-07	16.4	27.5	21.7	20.8228
2011-08-08	15.3	22.8	17.7	21.3688
2011-08-09	12.2	20	16	16.9613
2011-08-10	11.6	17.2	13.8	13.1345
2011-08-11	10.9	15.1	12.9	11.0208
2011-08-12	13.8	24.9	19.2	20.6686
2011-08-13	15	22.4	17.8	26.7201
2011-08-14	12.2	24.8	17.9	31.5264
2011-08-15	13.5	23.8	18.2	24.6944
2011-08-16	15.5	21.9	18	22.3617
2011-08-17	12.2	21	16.1	24.0758
2011-08-18	9.3	25.7	18.9	27.4506
2011-08-19	17.3	23.3	19	19.176
2011-08-20	12.2	19.8	15	15.0934
2011-08-21	11.6	22.5	16.2	27.1025
2011-08-22	11.8	23.9	16.8	20.5706
2011-08-23	13.7	22.1	17.8	24.2791
2011-08-24	13.8	23.4	18.1	21.9931
2011-08-25	15.1	23.9	19.7	22.7524
2011-08-26	14.8	27	21.6	27.7907
2011-08-27	18.7	30.5	24.6	26.3983
2011-08-28	14	26.9	16.2	21.2759
2011-08-29	11	22.2	16.1	19.2246
2011-08-30	10.4	17	13.2	12.1846
2011-08-31	9.4	18.4	13.6	18.4809
2011-09-01	11.7	18.8	13.8	12.5235
2011-09-02	10	19.2	13.8	14.8954
2011-09-03	7.6	20	13.3	17.2706
2011-09-04	7.9	22.9	15.9	14.9648
2011-09-05	13.1	25.7	19.5	11.4987
2011-09-06	13.5	22.3	16.5	11.5243
2011-09-07	12	17.9	14.2	8.58241
2011-09-08	11.1	14.1	12.2	9.67406
2011-09-09	10.1	16.7	12.2	8.12256
2011-09-10	6.2	17.9	13	10.5097
2011-09-11	10.6	24.9	17.9	13.414
2011-09-12	14.8	20.9	17.3	13.8598
2011-09-13	13.2	22.2	17.5	13.7164
2011-09-14	11.7	18.4	15.4	6.80577
2011-09-15	12.7	17.4	13.7	1.42611
2011-09-16	9.9	16.2	11.8	9.56509
2011-09-17	3.4	17	11	15.6036
2011-09-18	10.3	22.3	16.3	6.64848
2011-09-19	14.3	17.8	15.3	11.8872
2011-09-20	11.2	17.1	13.3	14.6596
2011-09-21	6.8	20.2	13.4	18.0803
2011-09-22	10.3	19.3	15	13.0543
2011-09-23	8.7	15.5	11.7	7.91963
2011-09-24	8	16.5	11.5	9.82913
2011-09-25	5.2	20.1	11.8	15.0111
2011-09-26	6	21.5	13.2	8.85497
2011-09-27	8.7	20	13.3	11.0855
2011-09-28	8.9	17.2	13	4.01973
2011-09-29	12.3	18.2	14.5	2.89533
2011-09-30	10.2	22.7	15.7	15.5055
2011-10-01	9.5	17.5	13.8	8.91562
2011-10-02	9.4	18	12.5	10.6013
2011-10-03	9.4	20.5	15	7.54239
2011-10-04	14.4	22.7	18.1	12.2678
2011-10-05	13.1	18.6	14.4	10.5786
2011-10-06	12.8	20.7	16.6	8.77333
2011-10-07	9	17.9	10.6	6.09952
2011-10-08	5.3	11.6	7.4	1.65989
2011-10-09	3.6	13.9	7.9	7.1973
2011-10-10	4.8	9.5	8	-0.835866
2011-10-11	7.9	12.7	9.9	6.13825
2011-10-12	5.7	11	8.2	2.37367
2011-10-13	4.9	10.2	6.4	-4.9649
2011-10-14	3.5	9.8	6.3	2.67457
2011-10-15	4	8	6	6.61064
2011-10-16	2.4	10.2	5.6	4.81641
2011-10-17	-1.6	10.6	4.2	2.20444
2011-10-18	-0.7	11.5	6.1	0.501496
2011-10-19	7.2	9.8	8.2	2.95424
2011-10-20	4.8	8	5.7	-2.31721
2011-10-21	2.1	8.1	4.6	0.62115
2011-10-22	2.5	10.3	4.7	1.71835
2011-10-23	-2.9	8.5	2.3	2.25326
2011-10-24	-1.5	9.9	4.3	0.0798479
2011-10-25	3	10.2	6.1	0.867745
2011-10-26	3.4	10	7.1	-4.24102
2011-10-27	4.9	9.4	6.7	0.487867
2011-10-28	1.1	10.8	5.3	1.25184
2011-10-29	3.6	11.1	8.5	8.1497
2011-10-30	7.8	13.4	9.5	5.07565
2011-10-31	7.7	12.2	9.9	7.08578
2011-11-01	8.5	12	9.9	6.53824
2011-11-02	4.4	10.8	7	-0.0927677
2011-11-03	4.7	9.3	6.4	-1.2963
2011-11-04	3.2	9.9	5.5	-1.39012
2011-11-05	0.9	12.3	6.1	2.5659
2011-11-06	3.4	8.8	5.2	-3.32422
2011-11-07	1.7	6.4	3	-4.98893
2011-11-08	-2.5	7.5	1.5	-1.9733
2011-11-09	-1	5.7	2.6	0.682145
2011-11-10	-2.4	5.2	0.2	-6.67715
2011-11-11	-4	5.1	-0.5	1.26634
2011-11-12	-6.3	0.5	-2.3	-3.52324
2011-11-13	0.3	2.8	1.2	-4.32078
2011-11-14	-1.2	1.9	0.5	-3.98766
2011-11-15	1.7	5.6	4.1	-4.5126
2011-11-16	-3.2	4.8	-0.1	2.8953
2011-11-17	-5.6	3.8	-1.7	-3.6059
2011-11-18	-3.2	-0.4	-1.2	-6.30959
2011-11-19	-0.9	3.3	1.8	-9.44287
2011-11-20	3.3	6.2	5.3	0.125615
2011-11-21	4.5	6.4	5.4	2.02877
2011-11-22	3.7	6.7	5.1	1.54137
2011-11-23	-0.1	5.9	2.6	0.780128
2011-11-24	-1.7	1.5	-0.2	-5.61839
2011-11-25	0.5	5.8	3.8	-4.08687
2011-11-26	4.5	6.7	5.3	-5.42887
2011-11-27	4.5	7.5	6.6	-9.48979
2011-11-28	3.6	8.4	5.9	-15.3141
2011-11-29	1.1	5.9	2.5	-3.47714
2011-11-30	-0.5	4.5	2.2	-3.59994
2011-12-01	0	4.1	2.4	-7.74723
2011-12-02	2.5	8.4	6.1	-2.26725
2011-12-03	3.6	8.3	4.4	-10.1471
2011-12-04	2.9	7.5	4.7	-7.31455
2011-12-05	2.7	4.1	3.4	-7.09768
2011-12-06	-0.2	3.2	1.6	-6.34468
2011-12-07	0.1	2.6	1.3	-7.85965
2011-12-08	-0.5	2.5	1.1	-8.70102
2011-12-09	-0.8	4.7	2.5	-12.1378
2011-12-10	1.3	4.5	2.1	-11.1553
2011-12-11	0	2.5	1.4	-11.1519
2011-12-12	-2.4	1.9	0.2	-7.35724
2011-12-13	0.6	4.3	3.4	-10.5688
2011-12-14	3.7	7.2	5.4	-5.02008
2011-12-15	2.5	7.9	4.6	-4.68241
2011-12-16	0.2	4.8	2.3	-11.721
2011-12-17	2.1	5.4	3.2	-9.28401
2011-12-18	0.4	3.2	1.9	-9.49529
2011-12-19	0.7	2.7	1.8	-13.3394
2011-12-20	-3.8	2	-0.9	-4.18179
2011-12-21	-8	-2.1	-4.8	-4.52857
2011-12-22	-6.3	-1.1	-3.3	-3.91662
2011-12-23	-4.3	-0.2	-1.6	-7.74162
2011-12-24	-0.2	3.5	2.1	-4.54641
2011-12-25	0.9	4.5	2.7	-7.82518
2011-12-26	3.1	9.7	7.8	-10.6636
2011-12-27	6.8	9.8	8.2	-5.96564
2011-12-28	0	6.8	2.3	-2.98393
2011-12-29	3.4	5.6	4.1	-5.28356
2011-12-30	0.2	4	1.3	-4.10931
2011-12-31	-0.3	1.3	0.1	-5.52974
2012-01-01	-4.7	0.2	-1.8	-7.92271
2012-01-02	0.2	8	5.5	-3.57666
2012-01-03	2.7	7.8	4.5	-5.91006
2012-01-04	3.8	6.5	4.6	-7.07123
2012-01-05	1	4.4	2.4	-11.198
2012-01-06	0.7	3.8	2.2	-12.4711
2012-01-07	-2.1	1.6	0	-8.75492
2012-01-08	0.4	4.3	2.6	-2.93211
2012-01-09	-0.5	3.5	1	-8.71477
2012-01-10	-2.6	0.4	-0.7	-2.37968
2012-01-11	0	5.5	2.9	-6.24857
2012-01-12	1.5	7.1	4.7	-8.02993
2012-01-13	0.7	7.1	1.2	-10.113
2012-01-14	-1.4	1	-0.9	-24.1247
2012-01-15	-5.4	-1.1	-3.9	-10.9076
2012-01-16	-10.6	-1.6	-5	-7.33313
2012-01-17	-10.2	-3.4	-5.4	-10.0285
2012-01-18	-6.7	0.7	-2.1	-7.68855
2012-01-19	-1	1.8	0.5	-8.01392
2012-01-20	-0.5	1.4	0.3	-8.02287
2012-01-21	-1.7	0.3	-0.4	-10.9719
2012-01-22	-0.7	1.5	0.5	-4.01652
2012-01-23	0.1	1.2	0.5	-4.67421
2012-01-24	-1.9	0.8	-1.1	-9.14358
2012-01-25	-2	-0.5	-1.5	-6.67862
2012-01-26	-7.2	-1.4	-4.9	-15.0403
2012-01-27	-12.2	-7.1	-10.9	-17.0712
2012-01-28	-12.9	-9.2	-11.2	-19.3457
2012-01-29	-14.8	-6.4	-11.7	-17.4639
2012-01-30	-15.4	-7.7	-12.4	-16.8575
2012-01-31	-16.3	-7.2	-13.3	-16.218
2012-02-01	-18.1	-11.8	-16.2	-19.7639
2012-02-02	-23.5	-16.1	-20.7	-20.0424
2012-02-03	-25.9	-14.5	-19.9	-23.0881
2012-02-04	-22	-13.7	-19.1	-22.4673
2012-02-05	-27	-15.2	-21.2	-23.5462
2012-02-06	-23.6	-14.7	-18.9	-26.714
2012-02-07	-17.9	-9.9	-13.1	-19.8863
2012-02-08	-13.2	-5.6	-8.8	-11.8539
2012-02-09	-12.4	-8	-10.8	-19.4183
2012-02-10	-19.4	-9.6	-15.7	-15.3379
2012-02-11	-23.6	-6.7	-14.4	-17.2609
2012-02-12	-10.8	-6.6	-8.7	-14.8515
2012-02-13	-9	-3.9	-6.1	-11.1136
2012-02-14	-6.2	-1.1	-4.5	-6.90064
2012-02-15	-5.8	-4.2	-5.2	-16.4154
2012-02-16	-10.8	-4.4	-8.4	-15.4261
2012-02-17	-12.6	-0.1	-3.9	-14.7656
2012-02-18	-0.6	1.3	0.1	-5.57858
2012-02-19	-0.3	2.3	1.4	-6.64454
2012-02-20	-1.6	1.6	-0.5	-7.97102
2012-02-21	-3.3	0.5	-0.7	-12.0408
2012-02-22	0.5	3.9	2.5	-4.29417
2012-02-23	2.2	6	4	-14.72
2012-02-24	2.8	8.8	5.8	-7.10448
2012-02-25	2.5	6.9	3.5	-13.5073
2012-02-26	-2.1	2.8	-0.8	-19.5805
2012-02-27	-4.7	0.4	-2.7	-6.20826
2012-02-28	-10.2	2.1	-2.5	-10.1926
2012-02-29	1.3	7.9	3.9	1.9091
2012-03-01	1.6	6.8	5	1.10875
2012-03-02	1	5.6	3.5	-16.9912
2012-03-03	-0.2	5	1.4	-4.75828
2012-03-04	-5.9	3.1	-1.9	-2.70647
2012-03-05	-8.6	2.5	-3.1	-8.15534
2012-03-06	-8.2	-1.7	-4.7	-9.60403
2012-03-07	-4.9	0.3	-3.3	-4.69047
2012-03-08	-8.4	3.9	-2.5	-7.36043
2012-03-09	-6.3	2.4	-1.6	-3.95253
2012-03-10	-0.3	5	3.6	-4.66886
2012-03-11	0.3	5.4	2.3	-12.176
2012-03-12	-1.7	6.2	2.5	-4.71647
2012-03-13	0.4	10.9	4.6	-10.8915
2012-03-14	-0.6	6.9	1.9	-4.49081
2012-03-15	-3	9.3	2.8	-4.79177
2012-03-16	3.5	12.5	6.6	0.397654
2012-03-17	-0.3	18.4	9.1	7.11222
2012-03-18	2.3	13.3	4.1	-0.105884
2012-03-19	2.5	9.6	5.6	-0.0345264
2012-03-20	0.5	7.8	4.9	-5.01598
2012-03-21	6.8	10.9	8	-4.38892
2012-03-22	3.9	11.8	6.5	0.495244
2012-03-23	2	13.9	7.1	0.0473854
2012-03-24	-3.9	12.8	4.1	7.75754
2012-03-25	-0.1	9.5	4.3	-16.5343
2012-03-26	-1	11.6	4	-0.664896
2012-03-27	2.1	11.3	7.2	-8.90374
2012-03-28	0.4	17.6	10.1	2.18731
2012-03-29	4.9	11.5	6.1	-11.0977
2012-03-30	0.7	8.4	3.6	-0.296552
2012-03-31	0.2	3.1	1.6	-5.2141
2012-04-01	-1.6	4.2	1.2	-6.5931
2012-04-02	-0.6	5.4	2	-14.4813
2012-04-03	-2.1	5.8	2.1	1.39418
2012-04-04	0.2	3.5	1.3	-6.78051
2012-04-05	-2	6.5	1.5	0.867253
2012-04-06	-6.1	9.8	2.5	6.24036
2012-04-07	-0.6	5.9	3	1.53586
2012-04-08	-0.7	2.8	0.5	-11.985
2012-04-09	-5.8	7.7	1.7	5.34757
2012-04-10	0.1	12.1	6.5	-2.14783
2012-04-11	4.6	16	9.3	-0.789812
2012-04-12	5.8	16.6	11.3	4.54726
2012-04-13	5.9	13.2	7.6	2.43102
2012-04-14	2.5	12.2	6.5	2.62473
2012-04-15	3.6	11.6	8	1.96172
2012-04-16	3.6	10.7	5.1	-10.3348
2012-04-17	0.3	8.7	3.9	3.16686
2012-04-18	-3.6	12.2	5.8	9.8237
2012-04-19	7.2	9.9	8	1.15194
2012-04-20	7.1	14.7	9.8	6.54974
2012-04-21	2.9	18.7	11.1	13.7395
2012-04-22	8.3	18.7	12.3	14.592
2012-04-23	5.4	13	8	5.4776
2012-04-24	2.6	17.7	10.7	9.82773
2012-04-25	8.5	13.2	10.4	0.895731
2012-04-26	2.8	20.7	13.8	11.8698
2012-04-27	10.6	25.5	18.6	17.5215
2012-04-28	9	29.2	20.4	21.8927
2012-04-29	12.6	28.7	22.1	23.2123
2012-04-30	12.2	30.2	22.3	25.3532
2012-05-01	12.9	24	17.9	19.728
2012-05-02	6.7	22.5	15.4	17.0989
2012-05-03	2.9	22.8	14.6	20.1757
2012-05-04	12.6	22.6	15.4	15.8143
2012-05-05	9.5	22.7	15	8.24009
2012-05-06	5	13.1	6.8	-3.34677
2012-05-07	0.3	12.1	6.3	6.05653
2012-05-08	-0.2	16.8	9.5	13.4669
2012-05-09	3.4	20.6	13.5	16.2904
2012-05-10	11.6	26	19.4	16.4109
2012-05-11	17.3	27.6	21.6	17.0881
2012-05-12	9.3	25.1	10.8	-3.65675
2012-05-13	6.2	13.2	9	0.656083
2012-05-14	0.9	15.5	9.5	12.6428
2012-05-15	2.8	14.7	9.8	8.22399
2012-05-16	8.3	10.8	9.2	-3.62051
2012-05-17	6.6	11.2	7.6	-3.3296
2012-05-18	1.3	15.4	9.2	11.5291
2012-05-19	2.4	19.4	12.3	11.9366
2012-05-20	8.1	25.1	17.9	21.7291
2012-05-21	14.8	27.5	21.9	20.5957
2012-05-22	16.2	29	22.7	25.4783
2012-05-23	12.3	25.6	19.6	19.3228
2012-05-24	10.6	21.3	15.3	14.9187
2012-05-25	6.9	19.4	14.3	15.1376
2012-05-26	6.8	19.8	14.3	15.5661
2012-05-27	7.4	18.3	13.2	14.8546
2012-05-28	7.5	21.7	15	19.0126
2012-05-29	10.7	23.1	14.9	6.18905
2012-05-30	6.4	14	9.1	5.57589
2012-05-31	5	15.7	11.2	9.35614
2012-06-01	6.3	13.4	8.8	12.6489
2012-06-02	5.9	11.2	7.2	6.43869
2012-06-03	4	14.7	10.3	15.7943
2012-06-04	9.4	15.8	12.1	16.0524
2012-06-05	10.2	16.5	12.5	14.1425
2012-06-06	5.5	15.5	11.6	16.5624
2012-06-07	8.5	18.5	14.3	21.6676
2012-06-08	12.4	21.7	16.7	24.1887
2012-06-09	14.5	23.1	18.3	23.8406
2012-06-10	10.6	23.3	17.6	25.706
2012-06-11	11.6	20	15.4	19.848
2012-06-12	11.5	20.7	15.7	24.5439
2012-06-13	11.8	21.5	16.3	22.2892
2012-06-14	10.7	21.5	15	17.9622
2012-06-15	9.7	16.9	12.8	21.1402
2012-06-16	6.9	26	18.1	24.7342
2012-06-17	17	23.2	18.8	25.5414
2012-06-18	9.9	26.9	20.3	29.5799
2012-06-19	15.5	25.1	16.9	20.0386
2012-06-20	8.8	17.4	13.4	14.6519
2012-06-21	13.6	17	15.6	17.0977
2012-06-22	15.2	17.1	16.1	14.6606
2012-06-23	11.7	22.4	16.9	20.9801
2012-06-24	11	23.4	18.2	22.4299
2012-06-25	13.1	21	15.6	16.6091
2012-06-26	11.2	16.5	13	9.32022
2012-06-27	12.5	16.1	13.4	17.9081
2012-06-28	8.2	19.2	13.7	26.9692
2012-06-29	8.8	24.3	18	29.8426
2012-06-30	15.6	30	21.7	30.7792
2012-07-01	17.6	28.7	21.8	31.8013
2012-07-02	15	25.1	19	27.385
2012-07-03	15.3	24.6	19.4	24.5605
2012-07-04	18.1	25.8	21.3	29.4599
2012-07-05	16.3	27.6	21.7	31.4373
2012-07-06	20	32.9	25	28.5324
2012-07-07	18.2	31.1	24.1	36.6171
2012-07-08	17.2	24.3	20.2	31.0563
2012-07-09	16.1	26.4	20.5	29.684
2012-07-10	13.6	25	19	25.6897
2012-07-11	12.2	26.2	19.2	26.3682
2012-07-12	14.2	20.9	15.9	20.9705
2012-07-13	10.3	19.6	15.4	20.8781
2012-07-14	13.5	22.6	17.3	15.6243
2012-07-15	12.6	20.4	16.2	22.8117
2012-07-16	12.2	18.9	14.2	17.2116
2012-07-17	10	15.9	12.9	16.2893
2012-07-18	10	18	14.3	15.2259
2012-07-19	12.5	19.8	15.3	19.9899
2012-07-20	12	18.8	14.3	14.3213
2012-07-21	11.4	18.9	14.4	18.0235
2012-07-22	8.1	19.6	14.2	22.6708
2012-07-23	6.8	22.9	15.9	26.7198
2012-07-24	10.3	25.7	19.2	29.2422
2012-07-25	12.2	28.6	21.9	29.4839
2012-07-26	19.3	27.3	22.7	30.1513
2012-07-27	17.2	29.5	23.6	34.4438
2012-07-28	19	31.7	25.3	36.7105
2012-07-29	18.8	31.1	23.4	29.263
2012-07-30	17.5	24	19.3	27.0088
2012-07-31	11.3	22.8	17.2	24.8435
2012-08-01	13.2	22.8	18.2	24.7004
2012-08-02	15.5	28	21.4	27.9001
2012-08-03	17.3	27.5	21.2	24.4244
2012-08-04	13.4	24.8	19.1	29.7476
2012-08-05	13.9	28.2	22.3	30.4034
2012-08-06	17.7	30.1	22.1	30.9412
2012-08-07	15.7	24.2	18.7	18.5127
2012-08-08	13.6	19.6	15.7	18.6564
2012-08-09	12.2	18.8	14.2	18.6625
2012-08-10	11.2	18.1	14	11.5978
2012-08-11	12.5	19.2	14.4	14.8147
2012-08-12	9.2	17.6	13.1	16.2077
2012-08-13	9.4	18.5	14.7	13.2933
2012-08-14	13.1	18.9	15.2	11.3313
2012-08-15	14	17.4	15.5	16.4807
2012-08-16	14.2	20.6	16.7	22.8592
2012-08-17	12	21	16.1	20.655
2012-08-18	12.4	22.7	17.5	28.0609
2012-08-19	14.9	29.3	22.5	30.4156
2012-08-20	16.9	26.6	21.9	27.1986
2012-08-21	17.2	26.3	20.4	26.0889
2012-08-22	15.1	25.9	19.9	20.0851
2012-08-23	13.8	22.6	17.4	23.8051
2012-08-24	10.1	21.1	15.5	21.4521
2012-08-25	12.1	20.9	15.8	24.4317
2012-08-26	11.9	20.7	17	18.1459
2012-08-27	13.3	19.1	15.5	17.3637
2012-08-28	10.2	19.9	14.5	21.9512
2012-08-29	10.4	22.8	16.4	26.6676
2012-08-30	10	23.8	17.7	23.6179
2012-08-31	14.9	22.9	18.7	16.2727
2012-09-01	14.9	20.5	16.2	16.2546
2012-09-02	7.5	21.3	14.8	19.7926
2012-09-03	10.4	22.3	16.2	14.8871
2012-09-04	11.6	21.4	15.8	14.9572
2012-09-05	12.7	18.7	15	11.6056
2012-09-06	11.6	18.1	13.6	9.73287
2012-09-07	10	15.4	12.4	6.21807
2012-09-08	11.7	18.3	14.2	10.2002
2012-09-09	9.8	18.9	13.5	17.4216
2012-09-10	7	24.2	16.4	12.1385
2012-09-11	11	29.4	21	21.0057
2012-09-12	13.3	23.4	15.3	9.81218
2012-09-13	10.4	13.4	10.8	7.05921
2012-09-14	7.7	17.8	12.6	6.68096
2012-09-15	11.9	16.6	13.4	9.83781
2012-09-16	11.8	16.4	14.2	12.4121
2012-09-17	13.7	20.7	16.1	14.5403
2012-09-18	7.7	22.4	15.3	14.298
2012-09-19	10.6	17.2	12.3	5.84739
2012-09-20	7.5	15.5	9.9	6.3687
2012-09-21	2.4	15.6	9.2	8.84733
2012-09-22	5.9	12.4	9.5	3.95928
2012-09-23	8.1	13.7	10.1	-0.446516
2012-09-24	6.2	14.9	10.5	8.91638
2012-09-25	10.5	19.1	13	12.2058
2012-09-26	7.6	21.5	15	14.0226
2012-09-27	12.7	22.3	15.5	11.7834
2012-09-28	9.8	15.9	12	7.85771
2012-09-29	5.1	19	12.1	12.3364
2012-09-30	8.7	15.5	11.2	7.28584
2012-10-01	4	16.7	10.8	10.6156
2012-10-02	9.5	15.7	11.6	9.66254
2012-10-03	7.2	17.8	11.4	8.58344
2012-10-04	7.8	19.5	14.1	6.46318
2012-10-05	8.9	16.6	10.6	-2.14145
2012-10-06	9.3	14.2	11.2	6.23667
2012-10-07	6.6	12.2	8.1	6.41119
2012-10-08	5.6	11	8.5	2.56073
2012-10-09	2.3	10.2	7.1	-2.15825
2012-10-10	4.6	10.6	6.7	-3.7551
2012-10-11	4	10.5	6	-3.2137
2012-10-12	3.5	10.3	6.2	5.42721
2012-10-13	2.8	11.6	6.2	0.220705
2012-10-14	1.4	11.8	6.8	2.04085
2012-10-15	7.7	14.5	10.3	1.89118
2012-10-16	8.2	11.7	8.9	6.6716
2012-10-17	5.6	13.6	8.6	5.10542
2012-10-18	4.4	17.2	10.3	7.46087
2012-10-19	7.2	19.2	12.4	9.75917
2012-10-20	6.4	18.1	11.1	7.67413
2012-10-21	5	14.6	8.5	3.83283
2012-10-22	8.9	13.1	11.1	8.74469
2012-10-23	8.2	10.8	9	9.11373
2012-10-24	6.7	8.8	7.5	3.06375
2012-10-25	6.2	9.1	7.2	-0.258355
2012-10-26	0.5	6.4	2.7	-4.22798
2012-10-27	-2.1	2.8	0.3	-7.13433
2012-10-28	-2.1	4.8	0.2	-4.9004
2012-10-29	-4.6	5.8	-0.8	-4.41488
2012-10-30	-3.3	4	0.3	-4.8152
2012-10-31	0.7	3.5	1.9	-2.87194
2012-11-01	0.5	8.8	4.3	-6.93459
2012-11-02	5.2	8.7	7.3	2.45382
2012-11-03	1.4	8.8	4.7	-2.25852
2012-11-04	3.9	8.9	6.8	-2.07953
2012-11-05	3.8	8.4	7.1	3.95449
2012-11-06	2.4	6.5	4.5	-1.86309
2012-11-07	2.4	7.3	5.3	-6.70968
2012-11-08	5.6	7.9	7.2	-2.71834
2012-11-09	6.5	8.9	7.4	2.25217
2012-11-10	6.2	9.1	7.2	-6.89819
2012-11-11	4.5	9.7	7	0.137927
2012-11-12	5.5	8.9	6.9	2.01354
2012-11-13	3.2	7.7	4.3	0.228665
2012-11-14	-2.6	3.4	1.5	-4.39032
2012-11-15	0.9	3.1	1.5	-4.21768
2012-11-16	1.4	4.3	2.6	-5.65756
2012-11-17	0.5	2.8	1.5	-9.02834
2012-11-18	-0.1	4.3	2.2	-7.378
2012-11-19	4	6.5	5	-0.09504
2012-11-20	2.9	6.1	4.2	1.18143
2012-11-21	2.6	5.7	4.5	-2.8071
2012-11-22	2.6	5.5	4.2	-4.27011
2012-11-23	3.4	5.9	5	1.9389
2012-11-24	4.8	6.2	5.3	-2.73196
2012-11-25	2.3	5.5	3.8	-2.6446
2012-11-26	3.4	9	5.2	1.78771
2012-11-27	1.8	7.1	5.3	1.46897
2012-11-28	5.9	7.3	6.6	4.24639
2012-11-29	4.3	6.6	4.5	-3.22393
2012-11-30	1.6	4.3	2.3	-6.34569
2012-12-01	-0.7	1.9	0.3	-6.73697
2012-12-02	-1.6	0.9	-0.3	-7.08127
2012-12-03	-1.8	-0.4	-1.4	-6.0719
2012-12-04	-5.3	-0.8	-2.3	-8.97077
2012-12-05	-0.9	1.1	0.3	-6.18006
2012-12-06	-7.7	-0.5	-5	-11.4558
2012-12-07	-10.8	-3.7	-6.6	-7.64414
2012-12-08	-7.1	-3.8	-6.1	-13.4657
2012-12-09	-8.7	-6.8	-7.8	-25.169
2012-12-10	-8.6	-4.5	-5.4	-11.5264
2012-12-11	-5.3	-3.8	-4.8	-13.0459
2012-12-12	-5.2	-1.6	-3.4	-9.75543
2012-12-13	-8	-2.8	-5.6	-11.4913
2012-12-14	-11.2	-6.7	-8.4	-20.363
2012-12-15	-6.7	-0.8	-2.5	-19.0637
2012-12-16	-1.7	0.5	-0.3	-7.72657
2012-12-17	-4.5	0.5	-3.2	-16.3463
2012-12-18	-7	-3.8	-5.9	-15.4903
2012-12-19	-6.5	-5.4	-5.8	-12.4198
2012-12-20	-9.4	-5.7	-7.7	-15.8808
2012-12-21	-14.2	-8.3	-11.6	-17.6894
2012-12-22	-18.1	-10.3	-13.7	-17.1063
2012-12-23	-15.6	-11.7	-13.4	-27.4938
2012-12-24	-13	1.8	-3.7	-17.1296
2012-12-25	1.7	7.2	4.7	-4.67717
2012-12-26	1.4	7.8	4.4	-1.08759
2012-12-27	2.8	4.9	3.9	-4.56703
2012-12-28	-1.3	4.9	-0.1	-11.7388
2012-12-29	-5.3	1.1	-1.5	-7.5077
2012-12-30	-0.1	3.8	2.1	-3.84856
2012-12-31	1.2	4.2	2.9	-4.21439
2013-01-01	0.8	4.9	3	-1.62036
2013-01-02	2.6	4	3.1	-4.27073
2013-01-03	1.8	6.1	3.6	-9.44591
2013-01-04	3.9	6.4	4.5	-12.9217
2013-01-05	0.1	4.2	1.4	-17.2699
2013-01-06	-1.6	0.7	-0.4	-6.98582
2013-01-07	-3.8	-1.6	-3.2	-8.6316
2013-01-08	-4.3	-3.5	-3.9	-11.7832
2013-01-09	-4.4	-1.8	-2.9	-8.17469
2013-01-10	-2.4	1.6	-0.2	-13.8356
2013-01-11	-5.7	-0.3	-3.6	-11.8137
2013-01-12	-9.1	-5.7	-7.7	-18.0188
2013-01-13	-6.5	-3.4	-4.6	-11.8657
2013-01-14	-7.3	-4.6	-5.7	-19.7117
2013-01-15	-6.3	-4.3	-5	-11.1862
2013-01-16	-6.1	-2.3	-4.6	-10.4349
2013-01-17	-9.5	-6.1	-8.1	-16.8354
2013-01-18	-10.9	-7.5	-9.6	-16.0326
2013-01-19	-12.6	-8.9	-11	-18.3845
2013-01-20	-14.5	-9.5	-12.1	-15.9016
2013-01-21	-18	-11.5	-14	-21.6139
2013-01-22	-13.4	-10.9	-12.4	-22.3631
2013-01-23	-13	-7.6	-10.2	-16.2264
2013-01-24	-9.2	-5.2	-7.8	-10.8743
2013-01-25	-12.4	-4.9	-9.2	-10.1044
2013-01-26	-16.9	-10.3	-13.2	-20.0601
2013-01-27	-15	-11.8	-12.8	-20.9107
2013-01-28	-11.8	-3.7	-6.3	-17.3471
2013-01-29	-3.7	1.1	0	-6.30766
2013-01-30	0.8	6.9	3.5	-5.58342
2013-01-31	2.8	6.5	3.8	-12.9768
2013-02-01	0.8	4.1	1.8	-1.15946
2013-02-02	0.1	2	0.8	-7.75365
2013-02-03	-1.1	0.7	-0.5	-8.28517
2013-02-04	-1.4	0.8	-0.4	-7.43799
2013-02-05	0.2	4.6	2.5	-8.01699
2013-02-06	-1.1	3	0.3	-3.55524
2013-02-07	-3.3	-0.5	-1.8	-6.26976
2013-02-08	-1.4	0.8	-0.8	-9.25828
2013-02-09	-5.6	0	-2.4	-7.41119
2013-02-10	-2.5	-0.6	-1.9	-5.88333
2013-02-11	-3	-1.3	-2.2	-9.06146
2013-02-12	-3.1	0.3	-2	-8.30221
2013-02-13	-3.4	-0.1	-1.2	-10.3464
2013-02-14	-0.7	1.5	0.3	-3.99902
2013-02-15	-0.2	0.9	0.1	-4.12516
2013-02-16	-4	-0.1	-2.9	-8.76165
2013-02-17	-5.3	-2.1	-3.7	-7.84369
2013-02-18	-4.7	-1.7	-3.1	-9.4234
2013-02-19	-2.3	-0.1	-1.6	-4.88969
2013-02-20	-6.2	-1.8	-5.1	-16.6705
2013-02-21	-9.3	-5	-7.2	-14.6459
2013-02-22	-6.7	-3	-5.1	-10.6942
2013-02-23	-5	0.2	-1.7	-12.7883
2013-02-24	-0.3	1.2	0.5	-14.7337
2013-02-25	0.3	1.7	0.9	-11.6882
2013-02-26	0.4	4.6	1.9	-3.77815
2013-02-27	0.4	4.9	1.9	0.64516
2013-02-28	-1.6	5.9	1.6	-8.52428
2013-03-01	0.9	4.2	1.9	-14.4735
2013-03-02	-1.2	3.8	1.6	-7.15423
2013-03-03	1	4.3	1.8	-17.6356
2013-03-04	-3.6	5.5	0.8	-0.412121
2013-03-05	-2.4	9.5	3.2	2.17892
2013-03-06	-1.9	11.2	3.1	1.6352
2013-03-07	-2.6	5	0.9	-8.86909
2013-03-08	-3.3	0.4	-1.7	-13.6593
2013-03-09	-5.6	1	-3	-10.1839
2013-03-10	-7.2	-2.8	-6.3	-22.0977
2013-03-11	-8.2	-6	-7.1	-14.3554
2013-03-12	-7.4	-4.5	-6.5	-13.4567
2013-03-13	-11.5	-3.6	-8.5	-10.6001
2013-03-14	-18.7	-1.9	-9.7	-10.0057
2013-03-15	-10.7	-2.6	-6.6	-17.6994
2013-03-16	-8.4	0.2	-4.5	-7.83896
2013-03-17	-15.7	1.3	-6.1	-5.60023
2013-03-18	-11.3	1.3	-4.1	-10.7671
2013-03-19	-5.4	-1.6	-3.7	-16.5032
2013-03-20	-4.7	-1.4	-3.3	-5.40999
2013-03-21	-4.6	-1.9	-3.3	-7.0099
2013-03-22	-7.9	-2.8	-6.6	-12.9066
2013-03-23	-14.5	-4.7	-10	-12.4833
2013-03-24	-11.4	-1.8	-5.7	-9.15919
2013-03-25	-12.4	0.5	-4.9	-6.59104
2013-03-26	-10	1.4	-3.5	-1.73242
2013-03-27	-10.2	3.3	-2.7	-2.48475
2013-03-28	-6.1	3	-1.2	-10.5734
2013-03-29	-2.1	0.8	-0.8	-10.9107
2013-03-30	-1.2	0.6	-0.4	-6.42619
2013-03-31	-3.1	2.2	-0.7	-7.63754
2013-04-01	-1.4	-0.4	-0.9	-10.9511
2013-04-02	-1.7	1.3	-0.6	-3.67349
2013-04-03	-3	1.8	-0.4	-7.53471
2013-04-04	-0.9	1.2	0.1	-4.9946
2013-04-05	-0.4	1.3	0.3	-4.68558
2013-04-06	-0.8	4.1	0.9	-4.73412
2013-04-07	-4.6	6.7	0.6	1.54619
2013-04-08	-2.6	2.8	-0.5	-1.56921
2013-04-09	-8.7	3.7	-1.3	-2.47981
2013-04-10	-2	4.5	1.9	-1.58688
2013-04-11	1.2	9.3	5	2.50177
2013-04-12	3.9	11.6	7.3	0.106773
2013-04-13	4.2	14.7	8.8	1.11091
2013-04-14	3	8.9	4.4	-3.28839
2013-04-15	-2.1	12.4	5.9	5.49719
2013-04-16	1.4	17.9	10.5	7.81393
2013-04-17	8.1	19.6	12.7	8.01104
2013-04-18	6.6	22.9	15.6	11.2567
2013-04-19	8	20	11.6	12.9484
2013-04-20	2.4	12.7	6.3	-0.0633499
2013-04-21	-2.6	12.3	6.1	4.31471
2013-04-22	-0.9	17.7	9.8	9.22455
2013-04-23	6.8	18.3	12.4	6.4799
2013-04-24	7.5	16	11.7	5.13541
2013-04-25	9	15	10.7	-1.49624
2013-04-26	2.9	24.1	13.7	8.8411
2013-04-27	7.3	14.6	8.9	-0.319176
2013-04-28	4.7	11.2	6.8	1.02318
2013-04-29	0	14.1	8.1	5.75244
2013-04-30	5.6	14.8	10.5	10.5607
2013-05-01	4.2	15.7	10.1	9.00317
2013-05-02	3.4	15.5	11	8.67191
2013-05-03	7.9	13.3	10.3	8.76494
2013-05-04	9.3	18.8	13.8	7.97917
2013-05-05	6.4	20.4	13.9	14.7335
2013-05-06	2.4	20.5	12.9	19.5794
2013-05-07	7.7	24.3	17.1	12.9863
2013-05-08	15	27.8	21.4	16.9656
2013-05-09	14.9	27.4	20.5	21.8453
2013-05-10	12.6	25.3	18.6	13.443
2013-05-11	10.5	18	12.5	2.70808
2013-05-12	7.7	14.8	11.1	7.87761
2013-05-13	9.5	17.5	12.7	2.70693
2013-05-14	7.6	19.2	13.8	19.4691
2013-05-15	6	21.5	15.2	17.2002
2013-05-16	10.7	24.3	18.4	17.9553
2013-05-17	14.9	28	21.8	23.2725
2013-05-18	14.6	27.5	20.6	24.0468
2013-05-19	9.4	24.9	18.6	19.1922
2013-05-20	14.2	28.1	19.5	14.7187
2013-05-21	12.9	20.5	15.8	10.6056
2013-05-22	8	20.7	13.2	5.16098
2013-05-23	8.9	13.9	9.6	1.21841
2013-05-24	7.2	12.9	9.9	2.25332
2013-05-25	9.8	14.8	11.3	5.24657
2013-05-26	8.4	17.7	13	7.68601
2013-05-27	7.5	18.2	13.4	10.0036
2013-05-28	10.5	15.7	12.5	0.765656
2013-05-29	10.5	21.7	16.3	15.5514
2013-05-30	12.1	25.3	19.9	16.7308
2013-05-31	15.4	23.1	17.8	16.2064
2013-06-01	13.6	23.9	18.5	18.4457
2013-06-02	13.8	22.7	17.8	21.116
2013-06-03	13.3	25	18.6	22.9438
2013-06-04	12	22	15.1	23.287
2013-06-05	10.2	15.3	12.6	11.3263
2013-06-06	11.1	22.3	16	23.5813
2013-06-07	11	23.2	17	23.4328
2013-06-08	10.3	23.8	18.1	27.5913
2013-06-09	12.9	21.8	17.1	25.5274
2013-06-10	14.2	19.6	15.4	15.5748
2013-06-11	6.6	20.2	14.5	20.8509
2013-06-12	7.9	22.3	16.3	27.237
2013-06-13	10.1	24.1	18.7	23.4555
2013-06-14	17.4	23.2	18.3	14.2654
2013-06-15	10	22.9	17.3	24.5737
2013-06-16	15.2	22.5	18.2	21.7149
2013-06-17	9.7	22.5	17.2	23.6355
2013-06-18	11.9	25.5	18.8	29.9497
2013-06-19	13	28.4	21.9	31.1032
2013-06-20	17.4	31.8	24.8	29.0638
2013-06-21	19.4	33.3	23.9	33.9723
2013-06-22	17.1	27.8	22.6	32.0494
2013-06-23	14.7	25.8	20.1	29.1806
2013-06-24	14.8	25.4	20	22.0231
2013-06-25	15.4	24.4	18.5	20.6901
2013-06-26	14.8	19.8	15.8	16.3013
2013-06-27	11.7	17.9	14.1	21.3745
2013-06-28	7.7	17.9	13.6	17.9493
2013-06-29	11.8	22.2	16.8	26.9309
2013-06-30	10.8	18.9	13.4	13.64
2013-07-01	8.3	18.4	13.8	18.1521
2013-07-02	11	23.6	16	23.0121
2013-07-03	10.3	26.8	18.3	30.184
2013-07-04	14.9	29.2	22.8	30.3411
2013-07-05	16.1	25.5	19.8	20.3454
2013-07-06	12.2	21.8	17.2	22.1346
2013-07-07	11.9	23.1	17.7	23.7181
2013-07-08	10.3	25.6	18.6	29.2356
2013-07-09	15.7	23.5	19	26.3005
2013-07-10	12.9	24.7	18.1	27.1687
2013-07-11	11.8	21	16.3	22.6732
2013-07-12	14.3	18.9	15.5	15.0977
2013-07-13	14.8	20.3	17.2	17.748
2013-07-14	15	21.8	17.5	19.608
2013-07-15	12.4	21.3	16.1	21.1271
2013-07-16	12.6	20.9	16.6	19.5302
2013-07-17	13.4	24	18.3	20.4435
2013-07-18	13.1	25.5	19.2	28.6159
2013-07-19	14.7	22.9	16.8	14.8394
2013-07-20	9.5	20.2	15.5	17.2253
2013-07-21	10.5	26	17.8	21.2869
2013-07-22	11.1	22.3	16.2	16.5738
2013-07-23	10.7	17.5	14.4	10.4989
2013-07-24	14.3	17.6	15.8	11.9707
2013-07-25	14.8	18.9	16.6	18.3007
2013-07-26	13.4	25	19.3	28.1647
2013-07-27	13.9	28	21.3	32.8716
2013-07-28	15.6	30.3	23.5	31.8283
2013-07-29	21.9	30.4	25.1	29.9776
2013-07-30	17.5	25.1	20	25.62
2013-07-31	12.5	25.8	19	26.9334
2013-08-01	14	24.2	18.6	23.6923
2013-08-02	15.5	24	19.1	24.2051
2013-08-03	10.1	27.3	19.4	32.8178
2013-08-04	13.9	28.6	21.7	27.4292
2013-08-05	16.9	26.4	21.2	30.2443
2013-08-06	17.2	30.2	24.1	30.4428
2013-08-07	19.9	32.1	25.3	33.0417
2013-08-08	17.2	35.7	25.8	33.6141
2013-08-09	18	26.9	20.2	23.5031
2013-08-10	14	20.4	15.1	15.7319
2013-08-11	11.6	22.2	15.9	22.2174
2013-08-12	10.8	22.8	17	21.0187
2013-08-13	13.1	18	14.6	17.8503
2013-08-14	10.1	19.6	13.8	16.1745
2013-08-15	11	19.2	15	24.3311
2013-08-16	8.9	22.8	16.5	26.0836
2013-08-17	9.8	25.7	19	27.1601
2013-08-18	13.8	28.7	21.7	31.4863
2013-08-19	16.4	26.1	20.8	27.8191
2013-08-20	17	22.5	18.6	20.7468
2013-08-21	14.7	17.8	15.8	15.977
2013-08-22	12.5	19.8	15.8	19.5877
2013-08-23	12.3	20.9	16	18.8566
2013-08-24	9.3	21.1	15.6	23.7937
2013-08-25	6.6	19.9	13.8	21.8562
2013-08-26	6	21	14.7	24.1742
2013-08-27	8.8	22.6	15.9	23.6704
2013-08-28	8.2	20.7	14.4	22.2796
2013-08-29	7.5	22.8	15.5	22.7339
2013-08-30	9.9	22.4	15.7	23.032
2013-08-31	11.3	22.8	16.7	23.509
2013-09-01	13.6	18.7	15.2	11.9016
2013-09-02	11.3	14.2	11.9	1.67001
2013-09-03	9.3	18.7	13.9	3.08928
2013-09-04	7.3	19.9	13.3	15.7728
2013-09-05	7.5	20.5	13.6	12.6292
2013-09-06	6.4	20.7	13.9	19.7985
2013-09-07	7.5	21	13.5	18.8218
2013-09-08	4.7	22.5	14.2	17.2936
2013-09-09	7.5	23.5	16.5	13.7495
2013-09-10	11.3	18.5	13.5	8.09318
2013-09-11	8.1	17.5	12.1	10.7027
2013-09-12	10.8	12.2	11.3	8.64077
2013-09-13	10.4	13.1	12.2	9.62178
2013-09-14	12.9	15.3	14.3	11.1559
2013-09-15	12	15.7	13.6	12.4543
2013-09-16	12.1	15	13.5	13.2121
2013-09-17	11	13.5	12.3	2.50389
2013-09-18	9	14.8	11.6	8.73985
2013-09-19	8.4	16.2	11.5	4.33191
2013-09-20	8.9	16.7	12	5.128
2013-09-21	10.5	17.5	12.8	7.64453
2013-09-22	9.8	15.9	12.8	4.87514
2013-09-23	10.1	15.2	12.6	2.3495
2013-09-24	7.3	13.7	9.4	-7.4322
2013-09-25	5.4	10.2	7	2.94759
2013-09-26	2	10.9	6.3	2.17137
2013-09-27	3.1	11.1	6.7	5.78213
2013-09-28	3.3	10.1	6.4	2.92047
2013-09-29	0.8	11.3	5.1	10.5109
2013-09-30	-0.4	11.6	4.9	2.21377
2013-10-01	-1.2	10.8	5	4.15317
2013-10-02	0.2	8.2	4.4	4.79269
2013-10-03	-0.7	9.7	3.9	8.69998
2013-10-04	-3.4	10.2	3.6	3.97337
2013-10-05	1.2	13.5	7.4	2.59052
2013-10-06	6.9	12.2	9.4	8.26163
2013-10-07	8.7	15.4	11.5	7.49261
2013-10-08	5.3	16.2	11.1	11.5282
2013-10-09	7.1	16.3	11.3	10.0041
2013-10-10	9.7	12.8	11.6	8.7824
2013-10-11	8.4	18	12.2	13.9134
2013-10-12	7.6	10.7	9	2.15659
2013-10-13	8.7	12.4	10.8	3.35725
2013-10-14	6.5	13.2	9.4	8.69765
2013-10-15	2	12.3	5.6	2.10156
2013-10-16	3.3	13.2	6.9	5.74518
2013-10-17	3.1	10.4	7.8	0.793758
2013-10-18	6.1	10.8	8.1	-5.14228
2013-10-19	-1.6	8.9	3.8	1.7608
2013-10-20	3.6	13.3	9	2.69941
2013-10-21	9.6	14.6	12.1	7.6938
2013-10-22	10.3	14.5	11.6	8.57739
2013-10-23	10	17.1	12.9	3.45629
2013-10-24	12.6	16.2	13.6	7.17395
2013-10-25	5.5	12.8	8.4	8.25627
2013-10-26	5.8	13.7	12.4	8.07321
2013-10-27	11.7	15.4	13.5	10.3121
2013-10-28	9.6	16.9	14	6.21154
2013-10-29	10.1	18.7	12.3	5.93801
2013-10-30	6.5	11.3	8.7	4.8002
2013-10-31	5	11.6	7.2	2.28017
2013-11-01	2.1	9.7	5.9	3.06094
2013-11-02	4.8	9.1	7.5	2.22955
2013-11-03	8.9	12.1	10	0.541759
2013-11-04	5.5	9.8	7.6	-3.86701
2013-11-05	6.9	9.6	8.1	1.95218
2013-11-06	5.3	8.1	6.1	3.03192
2013-11-07	4.5	8.5	6.5	-0.322639
2013-11-08	4.3	9.4	5.8	5.84338
2013-11-09	1.6	11	7.5	-1.28885
2013-11-10	1.3	9.2	5.5	2.2926
2013-11-11	2.7	6.2	4.8	0.471291
2013-11-12	3.9	7	5.2	0.301354
2013-11-13	2.8	5.9	3.9	-2.32465
2013-11-14	1.9	4.8	2.7	-2.7202
2013-11-15	1.4	4.5	2.8	-0.428057
2013-11-16	1.9	4.6	3.5	-8.89144
2013-11-17	4.6	6.9	5.8	-2.36245
2013-11-18	3.3	6.5	5.2	-3.70683
2013-11-19	4.5	7.2	5.5	2.66668
2013-11-20	3	6	4.6	-6.25209
2013-11-21	4.4	7.1	5.6	3.5891
2013-11-22	3.7	7.1	5.7	1.77666
2013-11-23	6.6	8	7.2	3.10532
2013-11-24	4.3	7.2	5	-3.16334
2013-11-25	-1.6	4.3	0.8	-9.86574
2013-11-26	-2.1	1.8	-0.6	-9.16669
2013-11-27	-2.5	2	0.6	-11.4372
2013-11-28	1.5	7.1	4.9	-7.89115
2013-11-29	1.8	4.8	2.8	-3.58795
2013-11-30	0.4	3.4	2.1	-2.33067
2013-12-01	2.2	6	3.9	-10.8321
2013-12-02	-0.7	5.5	2.1	-6.58272
2013-12-03	-1.8	3.2	0.1	-3.02626
2013-12-04	-1	1.9	1.1	-10.1887
2013-12-05	0.3	3.6	2.3	-13.034
2013-12-06	-1.1	2.2	-0.1	-20.0276
2013-12-07	-1.8	-0.3	-1.2	-21.3265
2013-12-08	-4.3	-1.1	-2.5	-13.9582
2013-12-09	-5.6	4.3	-0.6	-16.568
2013-12-10	-8.5	0.2	-3.1	-5.09809
2013-12-11	-0.2	3.2	2.1	-2.63353
2013-12-12	0.9	2.7	1.5	-7.16517
2013-12-13	-0.9	1.9	0.8	-8.05749
2013-12-14	-0.8	1.9	0.7	-6.44159
2013-12-15	0.1	2.9	1.6	-5.44069
2013-12-16	2.8	4.8	4.4	-5.23426
2013-12-17	1.5	4.9	3.2	-1.5436
2013-12-18	2.1	5	2.6	-3.22054
2013-12-19	-0.9	2.1	-0.2	-8.81057
2013-12-20	-0.8	2.8	1.6	-3.75321
2013-12-21	1.7	4.4	3.3	-6.44098
2013-12-22	2.4	6.2	4.5	-5.03302
2013-12-23	2.9	7.5	5.1	-1.34023
2013-12-24	0.8	7.8	5	-7.08202
2013-12-25	3.9	8.4	5.9	-5.1488
2013-12-26	3.8	8.5	6.3	-1.60288
2013-12-27	3.6	8.7	5.4	-1.84309
2013-12-28	4.1	9.5	6.6	-0.5618
2013-12-29	4.4	7.9	5.5	-0.530213
2013-12-30	2.4	5.2	3.7	-2.95575
2013-12-31	-1.5	3.4	0.4	-6.85196
2014-01-01	0.6	1.1	1	-9.48481
2014-01-02	0.8	3.3	1.6	-8.44957
2014-01-03	0.3	3.1	1.8	-4.94113
2014-01-04	1.9	6.6	3.3	0.670543
2014-01-05	0.1	6.7	4.8	-5.88697
2014-01-06	1.8	6.1	3.7	-3.70788
2014-01-07	3.9	7.7	5.6	-0.708647
2014-01-08	3.1	7.4	5.1	-11.0215
2014-01-09	4	6.5	5.7	-3.21712
2014-01-10	4.1	8	5.4	-9.87846
2014-01-11	3.4	4.6	4.2	-5.94652
2014-01-12	0.6	4.2	1.8	-10.4913
2014-01-13	-4.9	2.3	-3.3	-18.0314
2014-01-14	-4.1	-0.8	-2.1	-8.98896
2014-01-15	-3.5	-1.1	-2.8	-11.4018
2014-01-16	-4.7	-3.4	-4.5	-15.5517
2014-01-17	-5.6	-4.6	-5.3	-16.4499
2014-01-18	-6.5	-5.1	-5.9	-16.5403
2014-01-19	-9.5	-5.3	-7.1	-21.893
2014-01-20	-9.6	-5.9	-8.1	-22.2829
2014-01-21	-10.6	-7.1	-9.6	-21.0201
2014-01-22	-14.5	-8.7	-11.4	-14.1108
2014-01-23	-19.5	-10.9	-15.4	-21.0898
2014-01-24	-18	-10.4	-14.8	-19.9101
2014-01-25	-17.9	-12.5	-15.2	-19.6586
2014-01-26	-15.2	-7.9	-9.9	-24.5964
2014-01-27	-9.8	-6.5	-8.1	-25.6727
2014-01-28	-8.2	-5.5	-7.1	-20.9916
2014-01-29	-12	-6.8	-11	-27.1152
2014-01-30	-14.1	-10.1	-12.4	-33.1077
2014-01-31	-14.4	-6.6	-10.3	-31.5421
2014-02-01	-6.8	-1.9	-4.2	-19.7058
2014-02-02	-2.9	-0.6	-2.2	-13.109
2014-02-03	-3	3.6	-1.6	-5.88918
2014-02-04	-8.8	2.1	-4.4	-12.3261
2014-02-05	-8.8	2.1	-3.5	-7.96122
2014-02-06	-4.7	4.3	-0.4	-3.68846
2014-02-07	0.2	5.8	2.9	-3.6824
2014-02-08	2.6	7.7	4.1	-1.50762
2014-02-09	0.7	4.1	1.7	-3.96175
2014-02-10	-1	6.4	1.5	-0.997665
2014-02-11	-2.9	3.3	1	-6.1118
2014-02-12	-1.4	5.2	1.7	0.476536
2014-02-13	-4.5	4.8	-0.3	-9.91258
2014-02-14	0.2	3.7	1.7	-7.12953
2014-02-15	-1.2	5.6	2.8	-6.37395
2014-02-16	2.4	7.9	4.5	-1.91682
2014-02-17	1.2	6	2.8	-2.10061
2014-02-18	-0.3	7.4	2.9	1.79084
2014-02-19	0.5	3.3	2.2	-1.93574
2014-02-20	2.6	6.9	4.2	-1.15878
2014-02-21	-1.5	9.9	4.7	0.534162
2014-02-22	2.9	7.5	4.8	2.48391
2014-02-23	-3.7	9.8	2	1.9519
2014-02-24	-3.2	8.9	1.5	-8.32397
2014-02-25	-0.3	6.7	1.9	-8.65074
2014-02-26	-2.3	5.1	0.8	-5.07257
2014-02-27	-1.6	5.5	1.1	-6.71101
2014-02-28	-1	2.8	0.8	-8.46999
2014-03-01	0.9	3	2.1	-6.02047
2014-03-02	1.4	2.8	2.1	-5.96619
2014-03-03	0.4	8.6	4.1	-5.49194
2014-03-04	-0.3	5.9	2.3	-6.26001
2014-03-05	2	5.2	3.1	-0.0152359
2014-03-06	2.2	4.9	3.1	0.32746
2014-03-07	0.7	8	4.1	1.40266
2014-03-08	1.5	9.6	3.9	0.261016
2014-03-09	-4.4	12.5	4.2	4.42984
2014-03-10	-0.7	14.9	7.8	7.16155
2014-03-11	-2.3	11.7	4.7	4.5071
2014-03-12	-3	11.3	3.3	5.87146
2014-03-13	-0.5	14.4	7.5	1.78744
2014-03-14	2.8	12.2	7.2	5.97995
2014-03-15	0.5	8.5	4.1	-29.3915
2014-03-16	0.5	4.7	1.8	-10.3804
2014-03-17	-0.5	10	5.7	-13.3186
2014-03-18	3.1	8.3	5.3	0.358111
2014-03-19	5.2	8.6	6.4	-1.79782
2014-03-20	6.5	13.2	9.2	-3.89012
2014-03-21	7.4	20.9	14.1	6.12363
2014-03-22	6.2	16.9	10.7	2.51501
2014-03-23	5.6	12.5	7.7	3.74089
2014-03-24	2.7	6.6	3.8	-6.15585
2014-03-25	0.9	5	3.4	-6.07942
2014-03-26	0	9.9	4.8	1.57997
2014-03-27	3.7	8.3	5.9	4.78204
2014-03-28	4.2	15.5	9.1	5.23703
2014-03-29	-1.6	13.9	6.5	9.9213
2014-03-30	-2.1	15.4	6.9	11.1731
2014-03-31	-0.3	13.5	6.2	2.73357
2014-04-01	-1.4	7.3	2.7	4.63339
2014-04-02	-4.8	10.6	2.8	4.86879
2014-04-03	0.2	12.2	6.1	-3.77672
2014-04-04	-1.4	9.1	3.8	4.77551
2014-04-05	-0.2	13	6.6	2.99549
2014-04-06	1.5	13.1	5.8	-0.926338
2014-04-07	2.1	15.8	10.3	3.97013
2014-04-08	9.6	21.5	13.9	7.65346
2014-04-09	6.2	13.2	7.2	0.873568
2014-04-10	3.5	11.5	7	4.87267
2014-04-11	1.3	12.9	7.2	6.4606
2014-04-12	5.6	13.3	9.6	6.23448
2014-04-13	4.9	11.8	7.4	2.86168
2014-04-14	3.8	9.1	6.7	3.70252
2014-04-15	4.8	11	6.6	1.35239
2014-04-16	2.4	10.1	4.8	-2.65865
2014-04-17	-3.9	12.7	5.6	6.80396
2014-04-18	3.3	14.6	9.6	5.21328
2014-04-19	8.1	22	15.8	15.2456
2014-04-20	9.8	20.5	15.3	12.0707
2014-04-21	11.8	18.5	12.9	13.8546
2014-04-22	5.2	21.6	14.6	15.144
2014-04-23	7.3	22.3	15.2	17.9824
2014-04-24	10.6	19.3	14.5	12.6122
2014-04-25	6.4	19.9	13.7	13.3101
2014-04-26	10.7	19.5	14.4	10.163
2014-04-27	10.6	15	11.9	7.84733
2014-04-28	4.7	19.7	13	15.2673
2014-04-29	5.3	20	12.9	16.5835
2014-04-30	2.2	19.9	11.8	13.2675
2014-05-01	4.6	18.7	8.9	-4.30566
2014-05-02	2	10.7	6.7	2.79561
2014-05-03	3.4	12.2	6.8	4.7677
2014-05-04	-2.3	11.2	5	-0.110012
2014-05-05	-1.7	11.8	5.6	6.26942
2014-05-06	-2.6	14	7.6	9.65911
2014-05-07	8.6	20	13	3.23461
2014-05-08	9	18.2	13.7	14.5301
2014-05-09	9.3	17	12.7	8.88218
2014-05-10	10.6	15.4	12.4	7.19581
2014-05-11	9.3	17.2	12.3	3.75338
2014-05-12	6	15.4	10.5	4.83535
2014-05-13	8.3	15.5	10.4	7.71639
2014-05-14	6	14.2	10.1	11.975
2014-05-15	6.3	17.7	11	4.46016
2014-05-16	6.3	18.2	11.9	1.57213
2014-05-17	11.5	21.4	16.1	7.82637
2014-05-18	12.3	22.3	16.5	14.2884
2014-05-19	9.9	22.5	17.2	19.9443
2014-05-20	9.4	24.6	18.2	25.5878
2014-05-21	14.5	27.4	20.7	20.9866
2014-05-22	14	28.8	22.5	23.7427
2014-05-23	16.6	29.2	23.6	23.4863
2014-05-24	18.6	30	23.9	18.5071
2014-05-25	14.5	25.8	18.6	12.5879
2014-05-26	11.2	24.8	18.8	18.2126
2014-05-27	15.4	21.4	17.4	11.8435
2014-05-28	9.8	17.8	10.5	1.98563
2014-05-29	7	10.8	8.7	2.09125
2014-05-30	6.4	17.1	11.7	8.70686
2014-05-31	6.6	21.5	14.2	14.1035
2014-06-01	9	18.7	13	10.3522
2014-06-02	10.2	15.1	12	9.31677
2014-06-03	11.4	17.6	14.5	20.2614
2014-06-04	11.9	19.6	14	20.0445
2014-06-05	8.1	24.7	17.6	27.8941
2014-06-06	13.9	22.1	15.4	22.3953
2014-06-07	7.8	24	17.5	24.7701
2014-06-08	16.3	24.9	20.3	26.1432
2014-06-09	12.6	26.9	19.2	30.7895
2014-06-10	10.4	26.6	19.9	26.9274
2014-06-11	11.7	26	18.9	29.2803
2014-06-12	13.1	21.6	17	19.8504
2014-06-13	11.1	18.1	13.1	13.7112
2014-06-14	10.8	14.3	11.4	8.47101
2014-06-15	10.3	14.3	11.3	13.239
2014-06-16	5.1	20	13.4	20.0463
2014-06-17	9.9	18.6	13.8	18.9596
2014-06-18	6.1	21.9	14.8	19.5663
2014-06-19	8.6	21.7	15.5	20.658
2014-06-20	11.3	16.5	12.9	14.4123
2014-06-21	9.7	15.7	12	12.0235
2014-06-22	9.4	15.9	12.4	18.0321
2014-06-23	8.9	14.5	11.3	14.6929
2014-06-24	8.9	17	12.6	13.2635
2014-06-25	8	17.3	12.5	17.784
2014-06-26	7.3	17.8	12.7	17.6528
2014-06-27	5.3	19.1	13.7	23.0398
2014-06-28	9.6	23.9	16.4	15.4941
2014-06-29	14.3	24.3	19.4	23.7631
2014-06-30	13.6	22.3	15.1	15.0303
2014-07-01	11.7	19	14.6	19.1788
2014-07-02	9.4	20.7	14.4	23.9496
2014-07-03	8.8	21.5	16.1	26.6582
2014-07-04	13.7	27.5	20.7	32.0052
2014-07-05	14.9	27.1	22.1	26.7385
2014-07-06	17.2	28	21.5	34.7738
2014-07-07	15.2	29.5	22.5	30.8567
2014-07-08	18.9	30.5	24.7	30.1319
2014-07-09	19	29.5	24.5	28.8815
2014-07-10	16.9	29	22.8	26.3001
2014-07-11	14.9	24.2	17.4	21.6328
2014-07-12	13.5	16.6	14.8	15.0459
2014-07-13	14.3	21.9	17.1	26.0603
2014-07-14	15.4	26.7	20.7	24.5382
2014-07-15	14.9	27.1	20.9	28.9724
2014-07-16	14.6	26.4	20.9	28.5293
2014-07-17	16.7	26.6	20.9	29.8335
2014-07-18	14.4	26.1	20.3	28.4033
2014-07-19	11.4	27.5	20.4	33.5938
2014-07-20	15.9	25.2	20.1	31.5961
2014-07-21	13	27.1	21.2	30.0433
2014-07-22	15.4	28.6	21.8	30.2165
2014-07-23	15.1	25.6	20.1	25.408
2014-07-24	15.9	27.8	22.3	26.7196
2014-07-25	16.9	29.7	23.2	33.1344
2014-07-26	18.8	30.8	24.8	34.6867
2014-07-27	17	31.4	24.5	32.9826
2014-07-28	18.7	32.4	25.8	35.2137
2014-07-29	18.7	32.5	26	36.0456
2014-07-30	17.2	31.1	24.7	28.3633
2014-07-31	20.8	25.8	21.8	23.9791
2014-08-01	17.6	22.2	18.8	21.6302
2014-08-02	16.5	32.7	23.9	35.5983
2014-08-03	17.6	34	27	34.813
2014-08-04	18.5	34.5	25.7	32.5049
2014-08-05	17.2	30.2	23.4	32.0269
2014-08-06	16.8	24	18.8	18.0632
2014-08-07	15.4	24.8	20.2	26.2803
2014-08-08	16.1	22.6	17.4	20.1034
2014-08-09	14.4	26.7	20.4	32.0565
2014-08-10	18	27	21.7	30.9792
2014-08-11	19.4	27.3	22.3	29.7886
2014-08-12	14.6	23.9	18.5	25.5974
2014-08-13	11.3	24.1	18.9	23.0758
2014-08-14	16.2	21.1	18	24.1087
2014-08-15	12	22.8	16.8	23.0434
2014-08-16	11.6	21.2	14.8	18.5408
2014-08-17	10.5	19.9	15	16.8918
2014-08-18	13.6	21.3	17.2	17.9792
2014-08-19	11	19.9	14.9	21.8042
2014-08-20	12.2	18.4	14.6	20.1211
2014-08-21	7.4	18.6	12.8	20.239
2014-08-22	6.7	20.5	13.8	20.5877
2014-08-23	12.3	21.5	15.9	22.2828
2014-08-24	10.2	18.8	14.5	16.225
2014-08-25	8.9	16.9	12.4	17.1545
2014-08-26	8.7	18.5	13	17.7731
2014-08-27	7.5	18.2	13	13.9464
2014-08-28	10.1	20.6	14.6	19.9322
2014-08-29	10.6	21.9	16.2	23.2593
2014-08-30	11	21.5	15.8	22.6341
2014-08-31	12.2	21.9	16.9	21.1385
2014-09-01	10.6	17.3	14	5.90208
2014-09-02	9.8	18.7	14.4	12.2466
2014-09-03	8.9	19.5	14.5	16.4732
2014-09-04	9.8	20.6	15	15.8395
2014-09-05	6.7	21.6	14.6	14.1568
2014-09-06	6.6	22.9	15.2	16.8169
2014-09-07	7.7	24.2	16.4	17.5337
2014-09-08	9.2	23.6	16.8	17.8483
2014-09-09	13.5	20.5	16	19.5173
2014-09-10	9.3	17.5	13.4	11.8654
2014-09-11	8	21.7	15.3	16.705
2014-09-12	15.5	25.2	19.3	20.4716
2014-09-13	11.6	26.2	19.3	15.5724
2014-09-14	13.7	25.2	19.6	21.7736
2014-09-15	13.2	22.5	16.8	15.7535
2014-09-16	7.6	20.4	13.8	13.7556
2014-09-17	8.8	20	13.8	15.8525
2014-09-18	7.8	22.2	15.2	14.5041
2014-09-19	10.3	20.7	15.4	13.7987
2014-09-20	8.4	22.7	15	16.9705
2014-09-21	8.1	22.5	14.9	15.3984
2014-09-22	10.7	17.4	12.8	12.0472
2014-09-23	7.1	12.3	8.9	-6.9391
2014-09-24	3.6	13.8	8.4	2.20528
2014-09-25	6.4	14.2	9.2	4.91941
2014-09-26	7.4	15.8	11.1	11.6603
2014-09-27	10.6	16.4	13.2	5.16178
2014-09-28	8.4	17.9	12.7	10.9475
2014-09-29	10.2	18.5	13.5	13.9005
2014-09-30	8.6	16.8	12.6	11.3602
2014-10-01	8.9	15.1	11.4	8.26964
2014-10-02	4.9	17.6	10.6	6.03122
2014-10-03	2.8	17.8	9.4	11.045
2014-10-04	2.2	15.9	8.1	9.45205
2014-10-05	0	15.4	7.7	4.71797
2014-10-06	3.1	13	7.4	2.21723
2014-10-07	6	15.8	10.7	2.84782
2014-10-08	11	14.5	12.8	5.00447
2014-10-09	11.5	22.4	16.5	9.23496
2014-10-10	12.6	20.9	16	15.9607
2014-10-11	9.4	20.1	15	14.6963
2014-10-12	13.3	17.3	14.3	13.1855
2014-10-13	7.9	18.6	13.1	7.99063
2014-10-14	10.7	17.2	13.4	7.11829
2014-10-15	10.5	13.2	11.6	7.26614
2014-10-16	9.5	12.4	10.6	8.28367
2014-10-17	9.2	12.8	10.1	5.18509
2014-10-18	2.6	9.2	4.2	-1.7565
2014-10-19	4.7	18.8	12.4	4.38262
2014-10-20	10.7	15.9	13	4.30169
2014-10-21	8.7	12.8	10.7	4.67228
2014-10-22	6.1	12.1	8.7	-3.28174
2014-10-23	2.3	6.1	2.8	-4.75116
2014-10-24	-2.3	4.4	0.2	-4.53827
2014-10-25	-3.6	3.6	0.8	-5.4388
2014-10-26	3	9.8	6	0.961424
2014-10-27	3.2	9	4.9	-3.79345
2014-10-28	-0.5	14.4	5.6	1.34301
2014-10-29	-1	12.3	4.7	1.50801
2014-10-30	-1.9	6.5	3.3	-0.14015
2014-10-31	3.6	7.5	5	2.71021
2014-11-01	4.6	6.8	5.6	2.56446
2014-11-02	4.5	12.3	7.6	2.83087
2014-11-03	5.4	12.3	8.7	2.09188
2014-11-04	4.4	11.8	7.8	5.53282
2014-11-05	4.8	15.3	9.1	7.15417
2014-11-06	6.1	14.4	10.7	9.58753
2014-11-07	6.1	12.4	7.4	6.00209
2014-11-08	0.6	6.1	3.6	3.13943
2014-11-09	5.2	10.1	6.5	-3.8176
2014-11-10	5.7	10.2	9.5	2.22112
2014-11-11	8.5	11	9.7	4.01714
2014-11-12	4.6	9.7	7	-7.76457
2014-11-13	4.2	7.1	6.4	-2.10874
2014-11-14	5.9	7.7	6.8	-1.30398
2014-11-15	3	6	3.9	-9.53609
2014-11-16	2.1	4	3.4	-11.8182
2014-11-17	3.1	4.6	4.3	-3.55421
2014-11-18	0.5	4.2	1.7	-10.5859
2014-11-19	-0.5	0.8	-0.1	-8.17204
2014-11-20	0.1	0.7	0.4	-2.60258
2014-11-21	0.2	2.2	1.1	-0.848169
2014-11-22	1.7	3.3	2.2	-0.228802
2014-11-23	-3.2	4.3	0.7	-9.57483
2014-11-24	0.7	3	1.5	-9.40099
2014-11-25	0.1	4.2	2.1	-2.46926
2014-11-26	2.4	4	3	-0.326371
2014-11-27	-2.3	2.4	-1	-10.4549
2014-11-28	-4.7	-2.3	-3.8	-13.4659
2014-11-29	-8.4	-3.2	-6.2	-11.9868
2014-11-30	-10	-5.2	-7.7	-15.5141
2014-12-01	-7.2	-3.8	-4.9	-18.1929
2014-12-02	-8.2	-1.8	-5.3	-14.1282
2014-12-03	-7.2	-3.9	-5	-6.62205
2014-12-04	-4.2	-2.4	-3	-5.69884
2014-12-05	-2.7	-1.5	-2	-13.5545
2014-12-06	-3	1.5	0	-4.27134
2014-12-07	0	1.6	0.9	-5.44683
2014-12-08	0	2	1.5	-6.44001
2014-12-09	-0.9	3.3	1.1	-4.34012
2014-12-10	-2.3	0.2	-0.7	-10.5938
2014-12-11	-0.4	1.6	0.9	-8.84992
2014-12-12	1.4	4.3	3	-8.14786
2014-12-13	3.3	8.2	4.5	-6.35072
2014-12-14	-2.3	3.5	1	-2.21069
2014-12-15	-1.5	6	3.2	-3.05983
2014-12-16	3.5	5.9	4.3	-2.56228
2014-12-17	1.8	4.5	2.6	-4.99516
2014-12-18	0.3	5.3	2.9	-2.12934
2014-12-19	5.3	11.1	9.2	0.786228
2014-12-20	2.9	7.6	4.1	-12.5641
2014-12-21	1.1	4.2	2.7	-8.147
2014-12-22	3	8.6	6.1	-11.8287
2014-12-23	4.9	7.9	6.4	-0.0461062
2014-12-24	3.4	7.9	5.8	-7.55512
2014-12-25	-0.8	7.3	1	-11.0359
2014-12-26	-7.7	-0.7	-6.6	-7.53108
2014-12-27	-11.4	-7.1	-10.1	-15.5861
2014-12-28	-10.8	-5	-10.2	-13.0417
2014-12-29	-10.8	-5	-8.1	-12.2345
2014-12-30	-16.8	-7.6	-10.6	-16.0684
2014-12-31	-7.7	-0.3	-2.5	-12.2778
2015-01-01	-0.3	2.3	1.5	-6.609
2015-01-02	0.7	5.2	3.1	-14.1339
2015-01-03	1.7	5.3	2.7	-12.5183
2015-01-04	0.6	2.5	1.4	-15.689
2015-01-05	-1.4	1.9	0	-8.29735
2015-01-06	-10.6	-0.2	-8.2	-12.5151
2015-01-07	-12.3	-5.3	-8.4	-21.3055
2015-01-08	-6.6	1.3	-1.3	-10.1424
2015-01-09	0.2	3.7	2.2	-9.80948
2015-01-10	2.4	9.2	4.2	-8.83758
2015-01-11	2.3	8.1	3.3	-12.3745
2015-01-12	0.2	4.5	2.5	-7.24176
2015-01-13	4.4	8.4	6.4	-4.34175
2015-01-14	3.2	9.1	6.2	2.16893
2015-01-15	-2.1	3.3	0.7	-9.09962
2015-01-16	1.1	9	5.1	-0.451799
2015-01-17	1.7	5.6	2.6	-6.67187
2015-01-18	-2.2	3.7	0.3	-3.21462
2015-01-19	-2.1	-0.2	-1.2	-10.2232
2015-01-20	-2.3	-1.1	-1.4	-9.57014
2015-01-21	-1.3	0.5	-0.4	-4.11273
2015-01-22	-1.3	0.7	-0.1	-5.44698
2015-01-23	-1.1	-0.1	-1.1	-8.55388
2015-01-24	-5.5	-0.7	-2.6	-7.10234
2015-01-25	-3.1	-1.4	-2.5	-8.75178
2015-01-26	-4.9	0.6	-1	-5.81069
2015-01-27	-5.2	-0.7	-2.1	-6.49669
2015-01-28	-1.1	0.9	0.3	-10.7067
2015-01-29	-0.6	1.8	0.4	-8.14201
2015-01-30	-3.3	2.3	-0.6	-11.3751
2015-01-31	-0.1	2.4	0.4	-7.24266
2015-02-01	-2	2.4	-0.3	-7.6808
2015-02-02	-2.6	1	-1	-4.48005
2015-02-03	-3.5	1.7	-1.2	-6.29002
2015-02-04	-3	0	-1.3	-7.51191
2015-02-05	-4.3	-1.4	-2.9	-5.36553
2015-02-06	-4.3	0.1	-2.8	-7.34523
2015-02-07	-2.6	1.2	-0.5	-11.2297
2015-02-08	-2.3	2.3	-1.5	-20.9547
2015-02-09	-2.9	2.9	0.2	-10.4017
2015-02-10	0.8	2.6	1.3	-3.97536
2015-02-11	0.6	1.6	1	-1.6999
2015-02-12	-0.5	1.1	0.2	-5.4677
2015-02-13	-1.4	2.4	-0.3	-5.69443
2015-02-14	-3.8	6.8	0.4	1.2205
2015-02-15	-4.3	0.7	-1.9	-12.6299
2015-02-16	-4.6	0	-2.1	-8.63134
2015-02-17	-6.6	2.2	-2.5	-16.3932
2015-02-18	-4.4	3.2	-0.5	-6.53596
2015-02-19	0.7	5.1	2.6	-6.4066
2015-02-20	-0.9	6.8	2.6	-3.46503
2015-02-21	-1.1	7.6	2.6	-1.74227
2015-02-22	0	4.6	2.1	-2.14828
2015-02-23	-1.4	5.4	2.6	-1.87749
2015-02-24	3.2	5.3	3.4	-0.897418
2015-02-25	-2.7	8.2	2.2	0.992331
2015-02-26	0	8.1	3.2	0.420523
2015-02-27	-0.6	4.6	2.5	4.15996
2015-02-28	1.4	7.6	3.7	-5.36253
2015-03-01	-0.5	7.3	3.6	-2.85474
2015-03-02	1.5	7.9	4.3	-6.78701
2015-03-03	1.4	4.9	2.3	-8.01844
2015-03-04	-0.2	1.9	0.5	-4.67323
2015-03-05	-0.6	1.7	0.3	-8.52026
2015-03-06	-3.2	2.3	0.6	-5.7068
2015-03-07	2	8	5.5	1.95308
2015-03-08	6.1	15.3	9.3	-0.0459369
2015-03-09	6.6	10.1	8.1	5.21478
2015-03-10	0.5	12.8	7.3	5.40634
2015-03-11	3.5	8.1	5.1	1.27745
2015-03-12	0.3	6.2	3.5	-4.40181
2015-03-13	-0.1	4.5	2.4	-5.3252
2015-03-14	1	6.1	5	-5.92189
2015-03-15	4.4	8.1	6	-4.45613
2015-03-16	3.7	10.7	6.5	-2.39416
2015-03-17	2.2	13.6	7.3	5.08375
2015-03-18	-2.3	12.9	5.4	4.8243
2015-03-19	-4.2	12	3.4	6.35758
2015-03-20	-3.4	10.6	4.4	3.07653
2015-03-21	3	8.7	4.5	-3.77299
2015-03-22	-5	3	-1.8	-4.51217
2015-03-23	-4	8.4	2	1.32095
2015-03-24	-0.5	13.4	5.9	6.2173
2015-03-25	-0.2	14.2	7.6	5.96319
2015-03-26	5.4	15.8	9.8	1.52377
2015-03-27	4.2	12.6	7.7	-2.41803
2015-03-28	1.7	8.5	4.5	2.16969
2015-03-29	-2.8	9.6	4.9	1.61617
2015-03-30	5.5	8.7	6.9	-3.14302
2015-03-31	0.4	6	3.7	-7.0549
2015-04-01	0.6	5.1	2.3	-18.0924
2015-04-02	0.5	7.2	2	-7.73917
2015-04-03	0.1	6.7	2.9	-5.0074
2015-04-04	0.6	5.5	2	-5.45534
2015-04-05	0.6	4.1	1.5	-10.3648
2015-04-06	0.1	6.7	2.7	-1.21909
2015-04-07	0.7	7.3	3.6	-0.730042
2015-04-08	4.4	12.4	6.6	-4.40107
2015-04-09	-3.1	13.7	5.9	10.2007
2015-04-10	0.5	17.6	9.3	12.1045
2015-04-11	2.2	20.1	12.5	15.7587
2015-04-12	5.8	15.7	9.6	-0.212188
2015-04-13	3.9	9.5	6.1	-10.9238
2015-04-14	2	9.9	5.2	-0.365619
2015-04-15	3.7	12.9	9.5	-0.259727
2015-04-16	5.8	11.9	8.3	-6.33117
2015-04-17	2.9	9.4	5	2.17569
2015-04-18	0.4	7.2	3.9	-2.64414
2015-04-19	1.5	8.2	4.8	-5.3794
2015-04-20	4.3	10.7	6.3	-4.6822
2015-04-21	1	13.4	7.1	6.13593
2015-04-22	0.7	14.6	6.9	8.81493
2015-04-23	0.8	19.5	11.3	6.16583
2015-04-24	8.2	16.4	11.3	3.02344
2015-04-25	6.6	22.1	15.6	17.124
2015-04-26	13.3	18.4	14.6	14.3713
2015-04-27	7.3	22.8	16	15.8007
2015-04-28	7.9	19.5	10.7	-0.476645
2015-04-29	4.1	11.7	7	-3.1861
2015-04-30	0.2	14.4	9	7.34645
2015-05-01	7.2	15.3	9.8	11.7698
2015-05-02	1.7	14.1	8.1	2.06249
2015-05-03	-1.1	14.5	8.8	10.6607
2015-05-04	3.4	16.9	11	2.04312
2015-05-05	5.5	22.2	15.9	13.3105
2015-05-06	13.7	20.1	13.9	16.2897
2015-05-07	6.3	19.5	12.7	2.93799
2015-05-08	5.7	16.9	11.2	9.18505
2015-05-09	6	19.7	13.2	14.9427
2015-05-10	10.4	16.9	11.7	15.8151
2015-05-11	7.5	16.1	10.8	10.0045
2015-05-12	4.9	20.9	14.6	6.98063
2015-05-13	8.5	18.3	10.9	4.44544
2015-05-14	6.7	13.6	9.6	5.25858
2015-05-15	3.7	14.2	0.08	-1.0643
2015-05-16	0.4	16.1	0.08	10.5244
2015-05-17	8.5	13.7	10	2.70773
2015-05-18	6	15.4	10.5	4.35244
2015-05-19	8.2	23.7	15.4	7.06466
2015-05-20	9.7	18.7	13.3	5.90861
2015-05-21	8.9	16.3	12.2	2.06345
2015-05-22	8.9	17.9	12.5	16.3283
2015-05-23	4.9	19.2	12.7	12.3387
2015-05-24	6.5	18.9	13.2	10.46
2015-05-25	6.5	20.9	15.2	19.1885
2015-05-26	10.7	18.5	13	3.11457
2015-05-27	6	14	10.4	5.42654
2015-05-28	6.3	17.3	12	7.84151
2015-05-29	9.1	17	13.1	8.31087
2015-05-30	10.3	21.1	14.2	14.6304
2015-05-31	5	18.2	12.6	9.08889
2015-06-01	7.8	25.2	16	23.3469
2015-06-02	9.3	23.9	17	22.1108
2015-06-03	15.9	26.8	19.4	27.4599
2015-06-04	9.7	19	13.4	17.7419
2015-06-05	3.7	22.3	14.6	27.5421
2015-06-06	9.8	28	20.9	32.2878
2015-06-07	14.7	25.9	15.7	17.3899
2015-06-08	5	19.4	13	17.8999
2015-06-09	9.4	15.2	12.4	15.4344
2015-06-10	4.9	20.3	13.5	28.3443
2015-06-11	4.7	22.5	15.3	25.8703
2015-06-12	7.5	27	18.8	28.5893
2015-06-13	14.9	25.9	20.1	30.5208
2015-06-14	15.1	25.4	19.9	21.4155
2015-06-15	12.7	19.3	14.4	15.1559
2015-06-16	4.9	17.1	12.3	13.3398
2015-06-17	8.1	19.8	14.5	25.1503
2015-06-18	13.4	18.6	15.1	14.7196
2015-06-19	10.9	17.4	12.9	17.1927
2015-06-20	7.5	17.8	13.2	18.8435
2015-06-21	9.6	17.8	12.9	20.42
2015-06-22	10.9	20	15.5	17.9909
[truncated: 558 more rows]

## Sheet: CSO
NUMBER OF DEATHS OF PEOPLE AT THE AGE OF 18 AND OLDER IN THE CITY OF OLSZTYN IN THE PERIOD 2010 – 2015
MALES
YEAR	NUMBER OF DEATHS	AVERAGE AGE	STANDARD DEVIATION
2010	728	69.3544	15.023
2011	713	68.2756	15.7961
2012	735	69.6442	15.4143
2013	784	70.9936	14.2717
2014	721	70.5055	14.5658
2015	787	70.2141	14.4017
TOTAL	4468
FEMALES
YEAR	NUMBER OF DEATHS	AVERAGE AGE	STANDARD DEVIATION
2010	658	76.4225	13.3005
2011	679	76.176	14.1292
2012	714	77.2325	13.8571
2013	689	78.7511	13.0025
2014	717	77.3452	13.7493
2015	722	78.0443	13.5098
TOTAL	4179
BOTH SEX
YEAR	NUMBER OF DEATHS	AVERAGE AGE	STANDARD DEVIATION
2010	1386	72.71	14.6624
2011	1392	72.1293	15.5171
2012	1449	73.3834	15.1504
2013	1473	74.6222	14.2292
2014	1438	73.9159	14.5716
2015	1509	73.9606	14.5189
TOTAL	8647
NUMBER OF DEATHS DUE TO HYPOTHERMIA OF PEOPLE AT THE AGE OF 18 AND OLDER IN THE CITY OF OLSZTYN IN THE PERIOD 2010 – 2015
YEAR	AGE	NUMBER
2010	41	1
2010	49	1
2010	51	1
2010	52	2
2010	54	1
2010	56	1
2010	57	1
2010	78	1
2011	50	1
2012	48	1
2014	53	1
2015	48	1
